# Supplementary material for: Acetylation of Checkpoint suppressor 1 enhances its stability and promotes the progression of triple-negative breast cancer
Source: PubMed Central journal article supplement (PMC9712368; doi:10.1038/s41420-022-01269-x), 2022-12-01

Fig 1A

CHES1

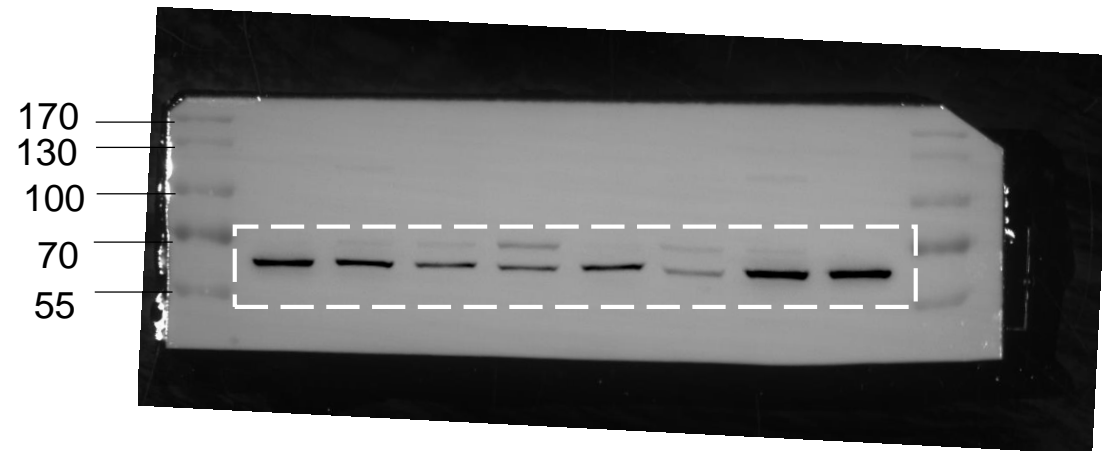

$\beta$ -tubulin

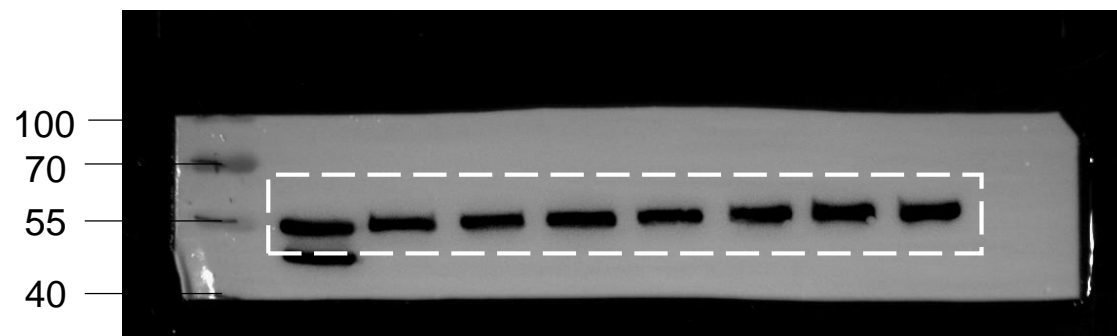

Fig 2A

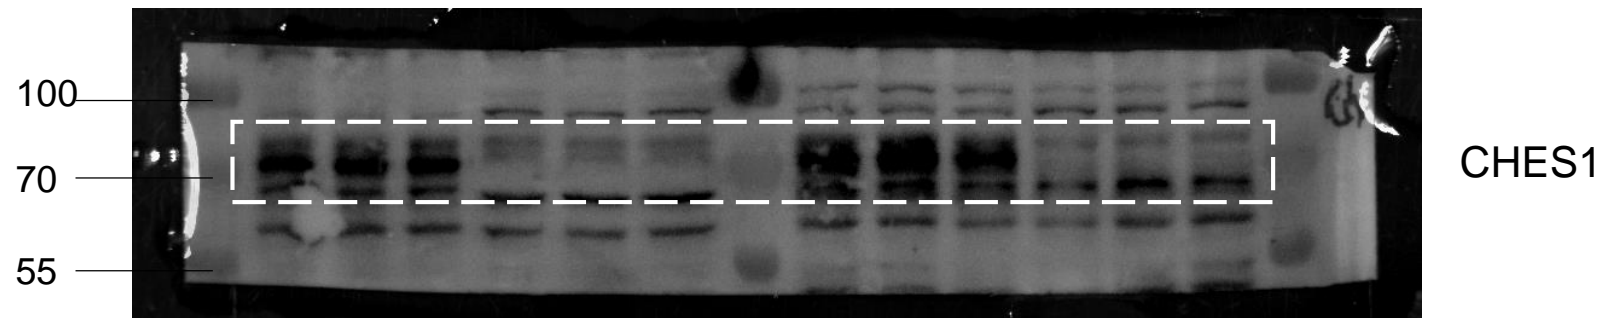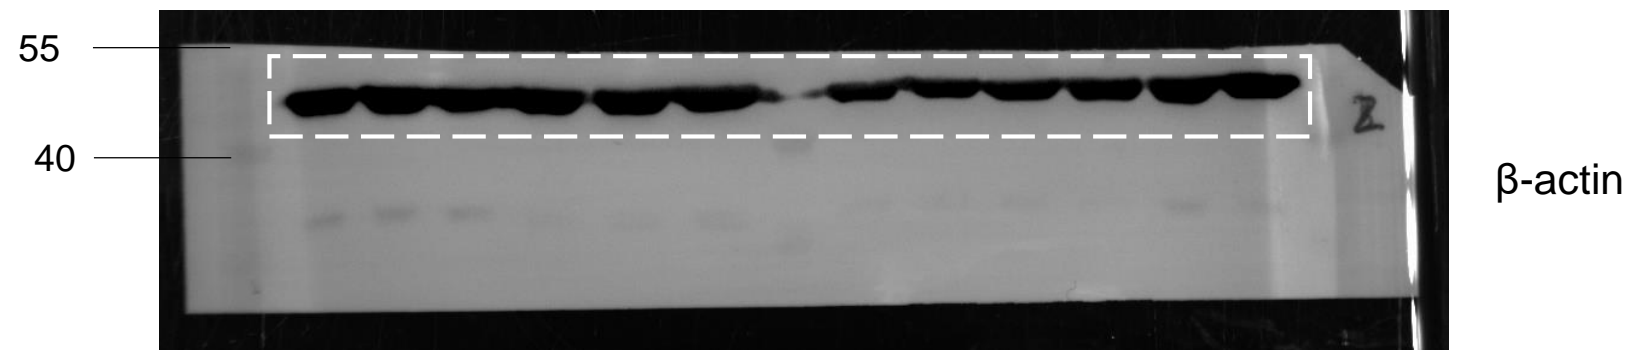

Fig 2F (BT549)

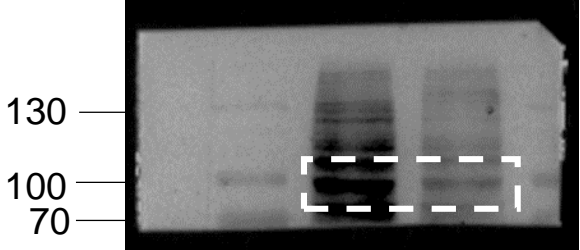

MMP9

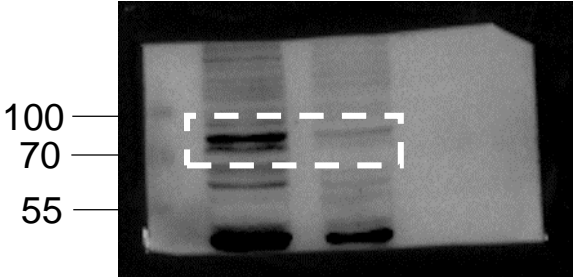

CHES1

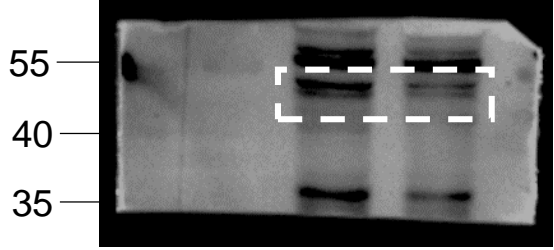

PDGFD

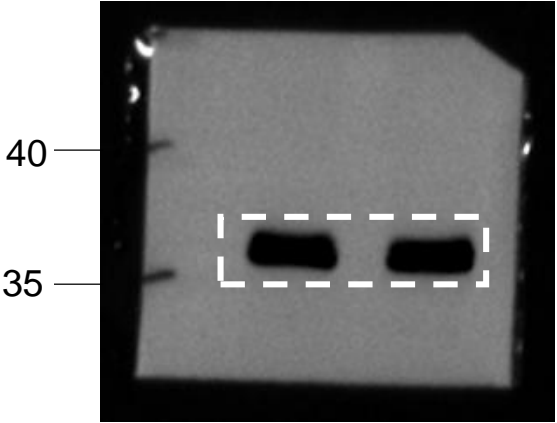

GAPDH

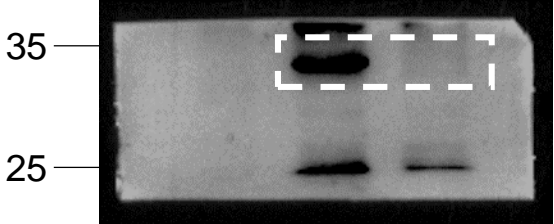

SNAI1

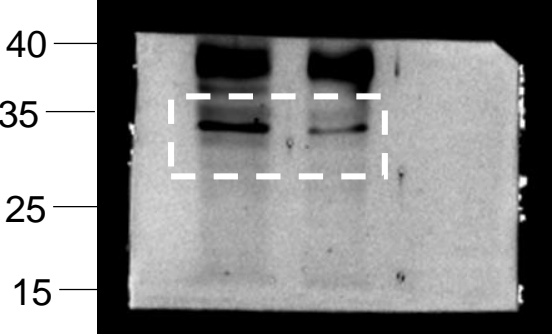

SIX2

Fig 2F (MDA-MB-231)

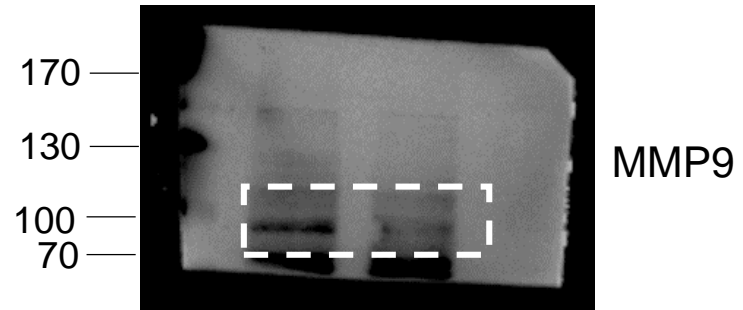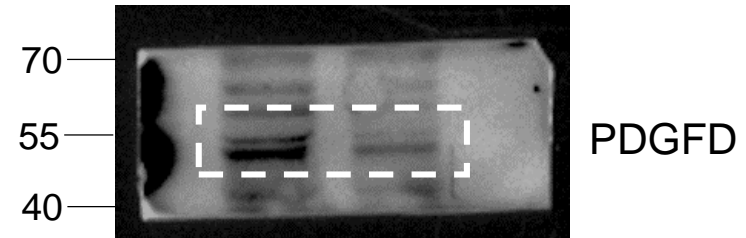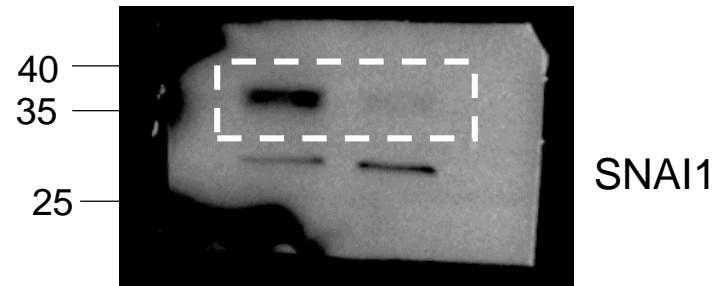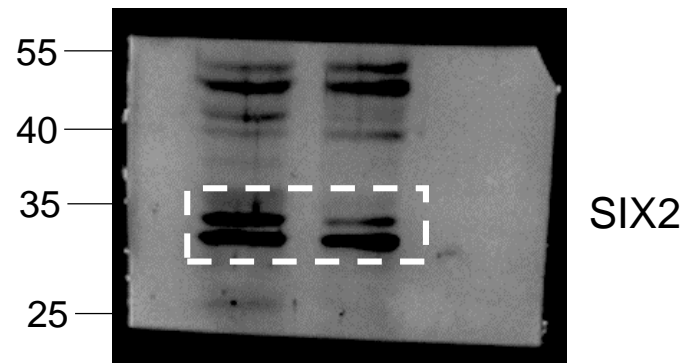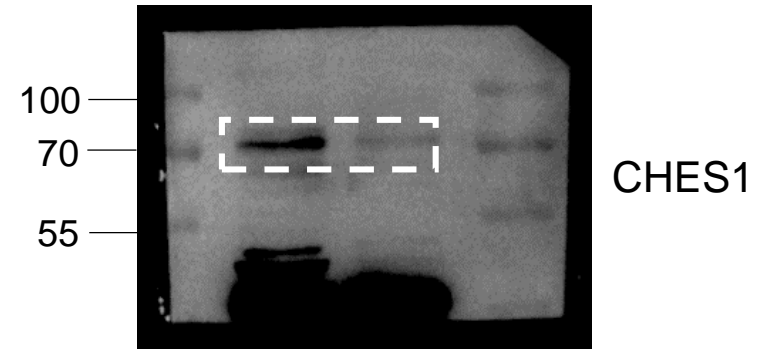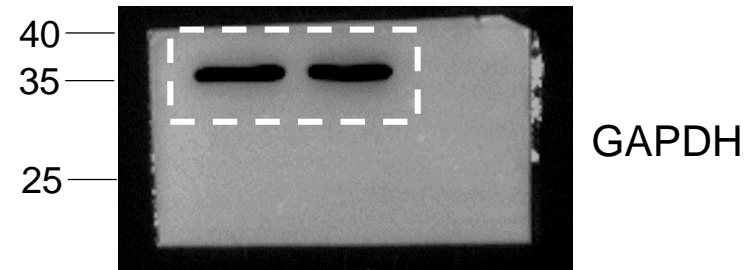

Fig 4A

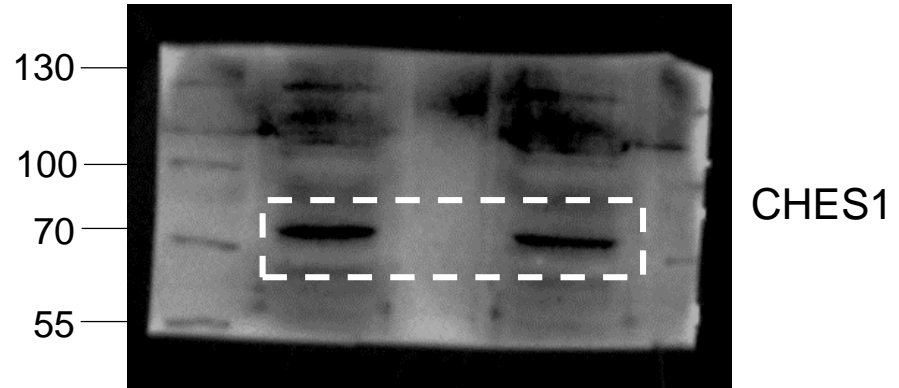

Fig 4B

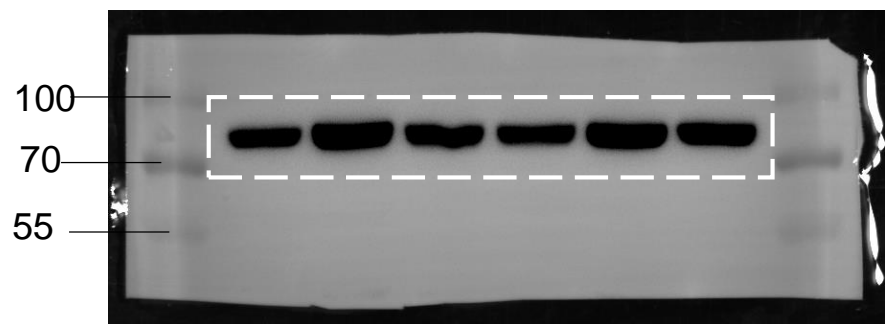

Input Flag

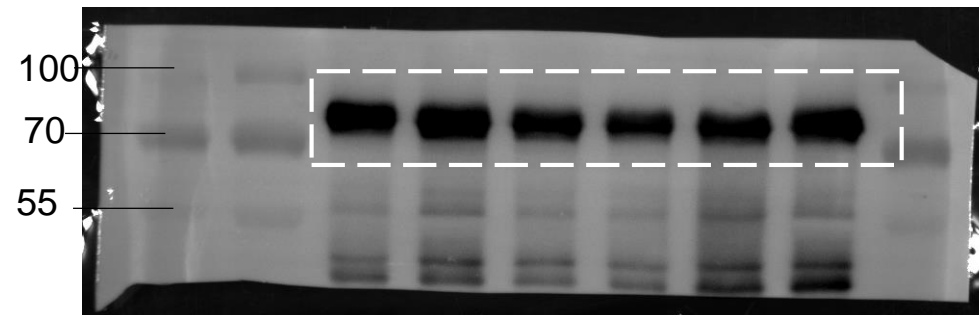

IP flag

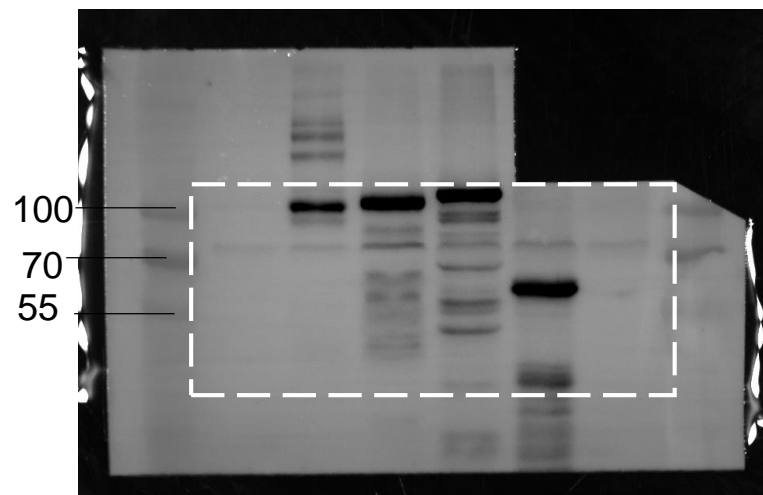

Input HA

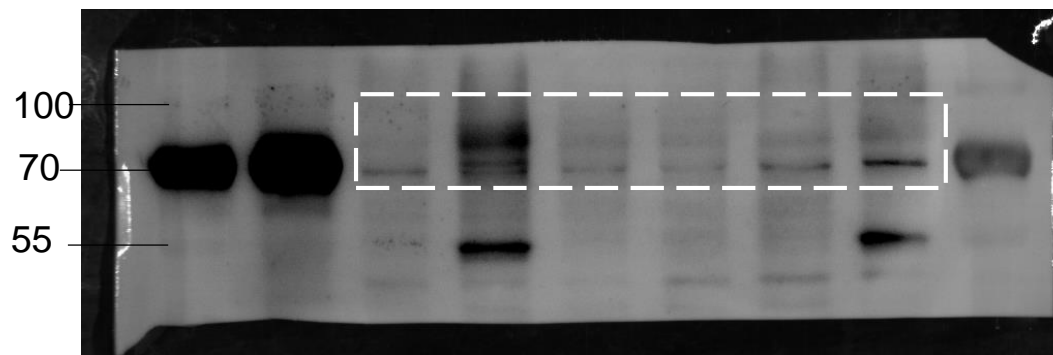

IP ace-k

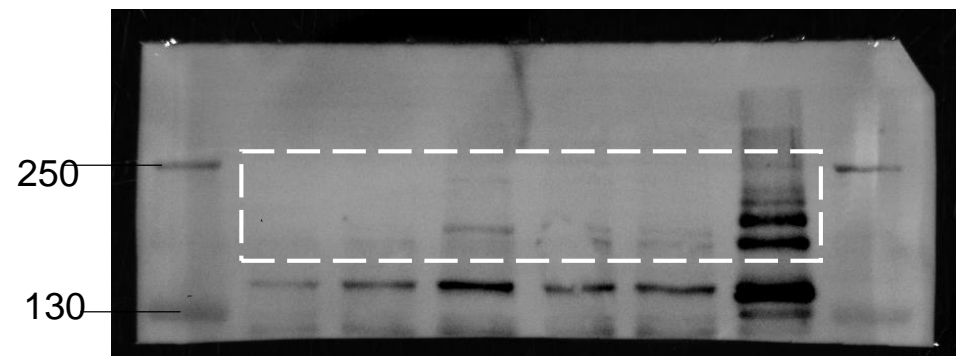

Input Myc

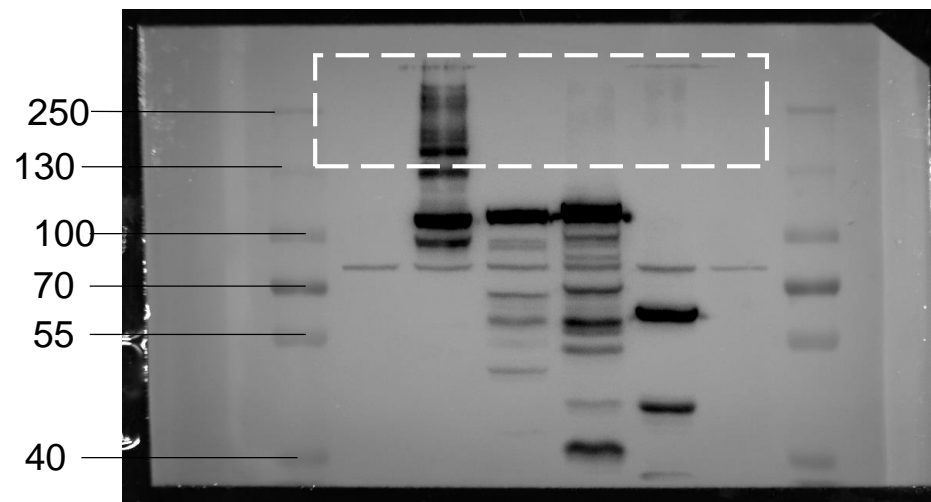

Input HA-p300

Fig 4C

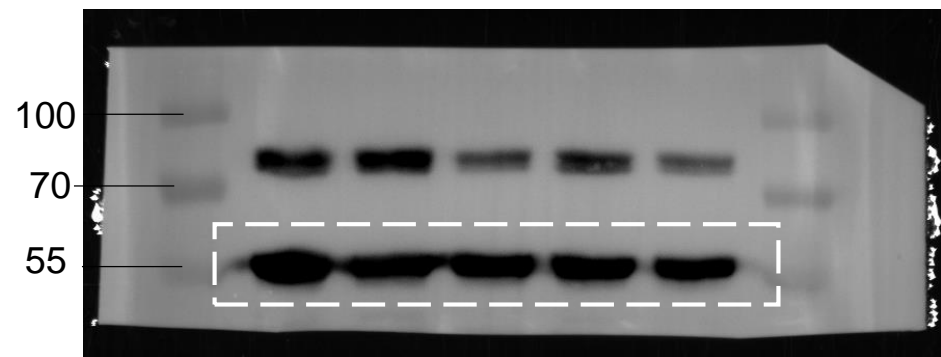

Input  $\beta$ -tubulin

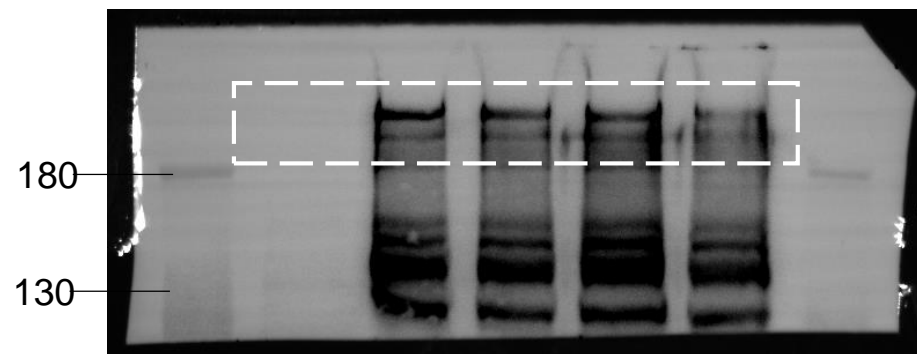

Input HA

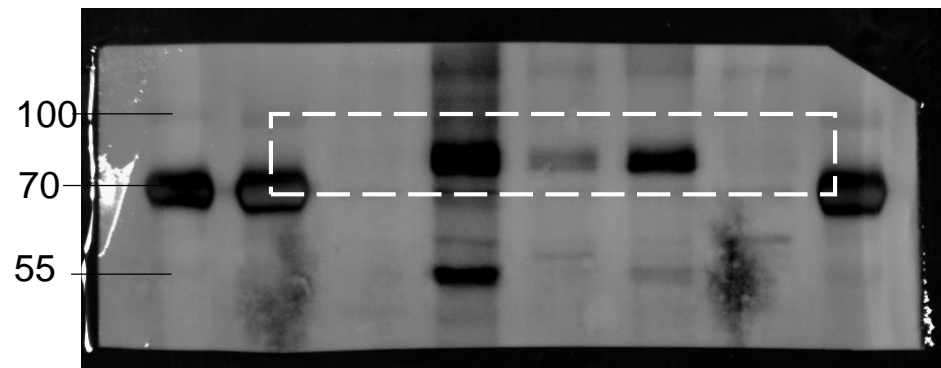

IP Ace-k

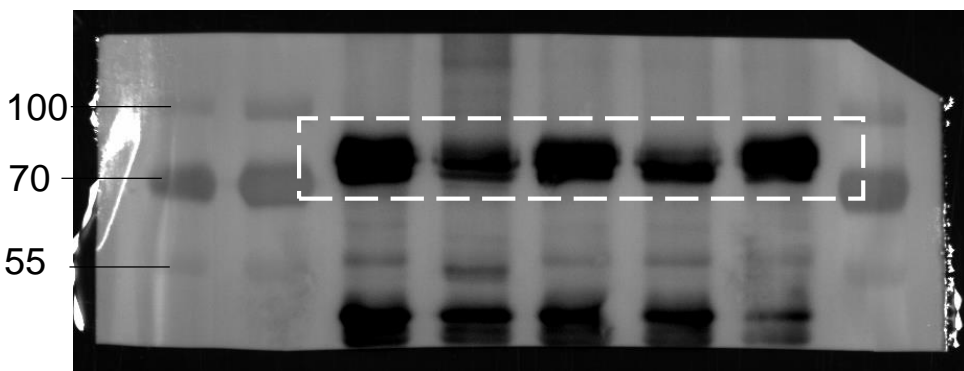

IP flag

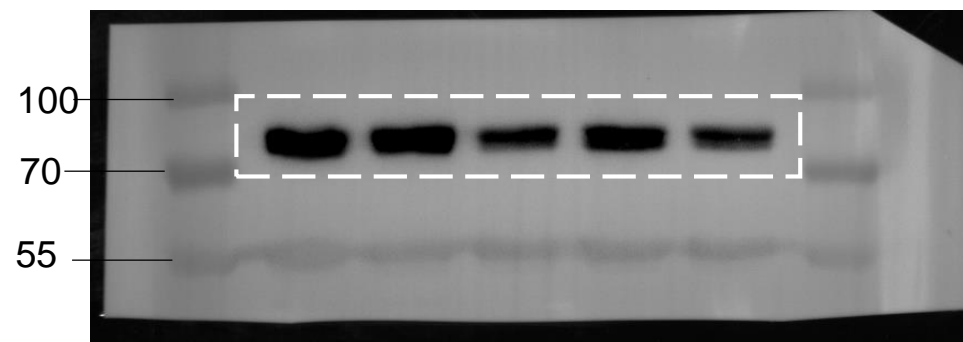

Input flag

Fig 4D

p300

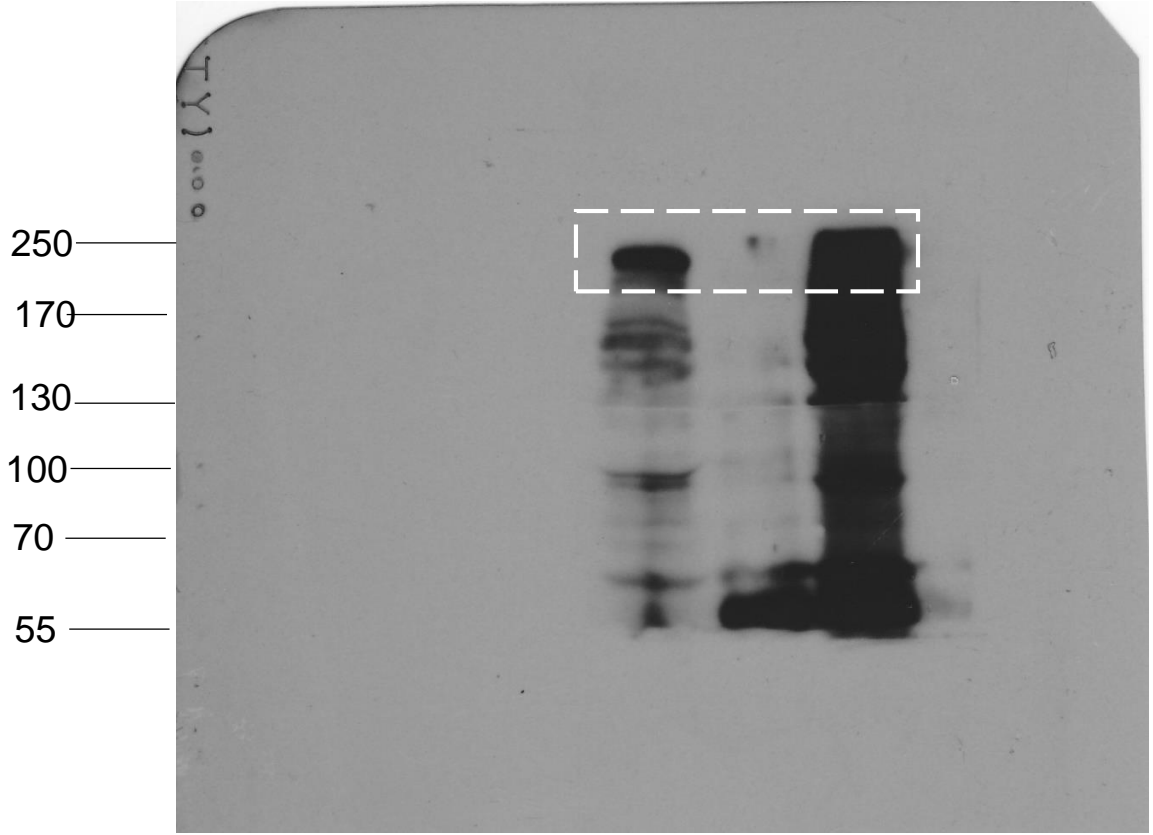

CHES1

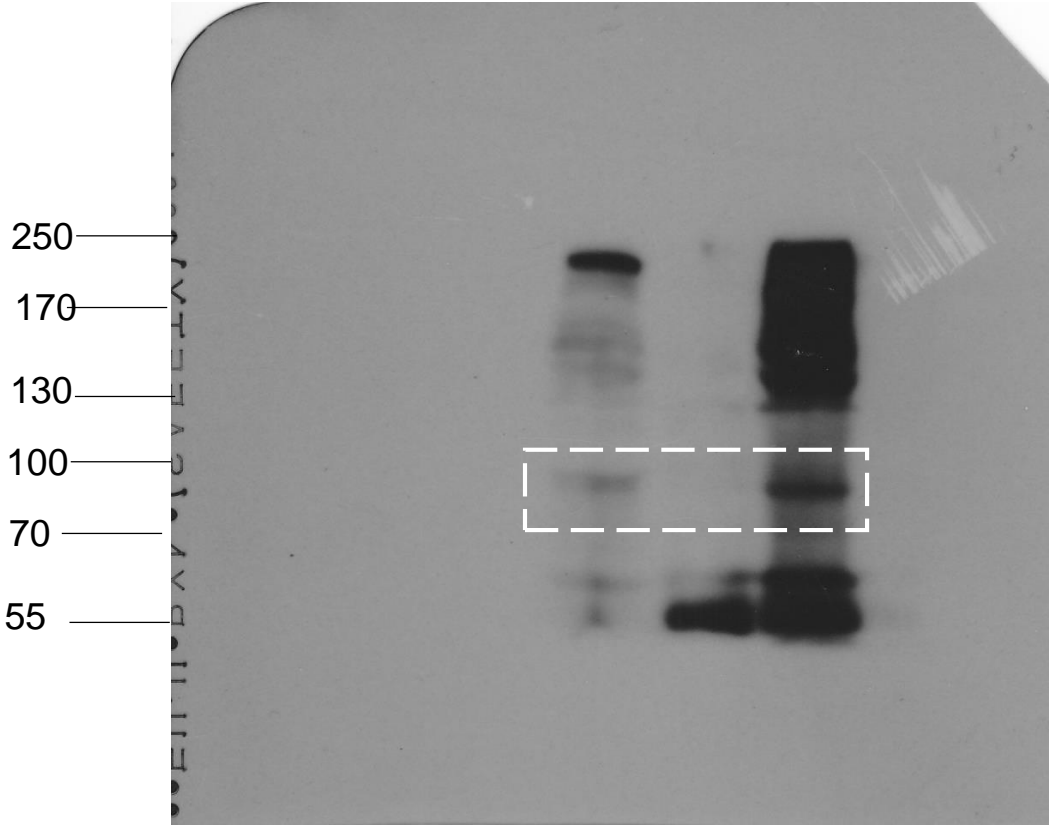



Fig 4E

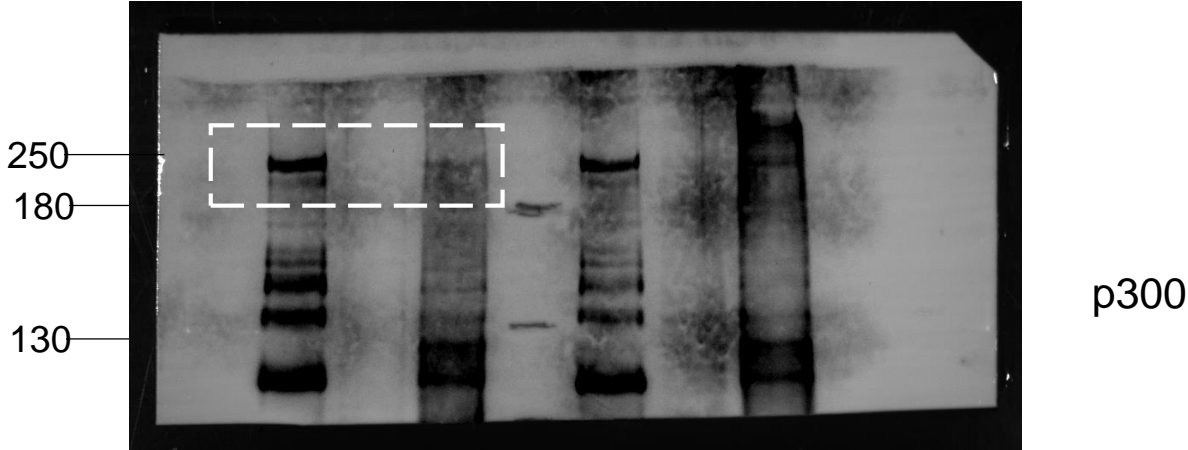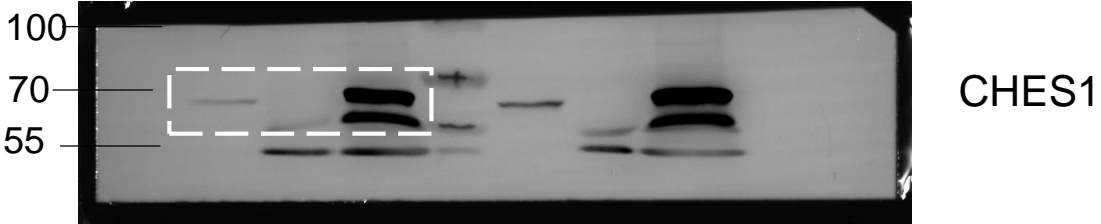

Fig 4F

IP Ace-k

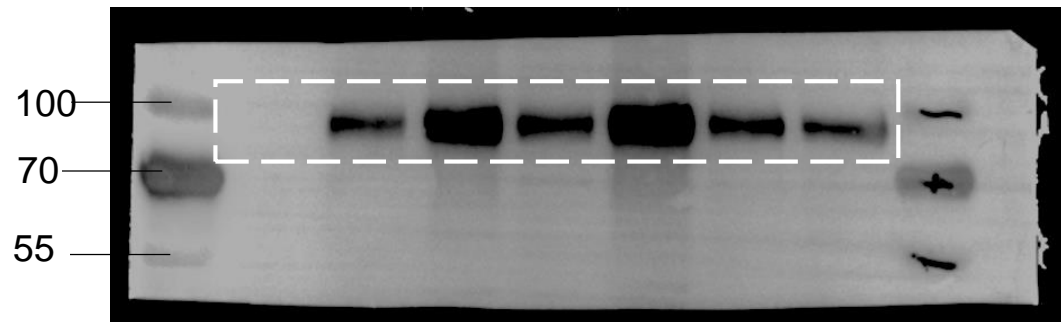

Input  $\beta$ -tubulin

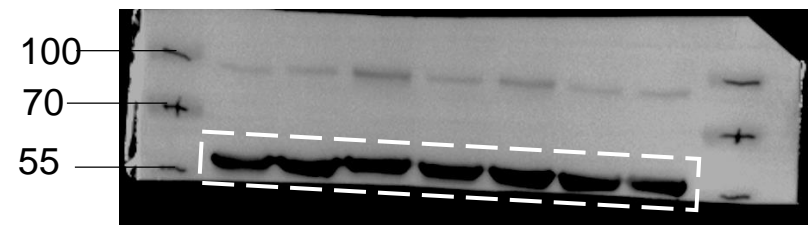

IP Flag

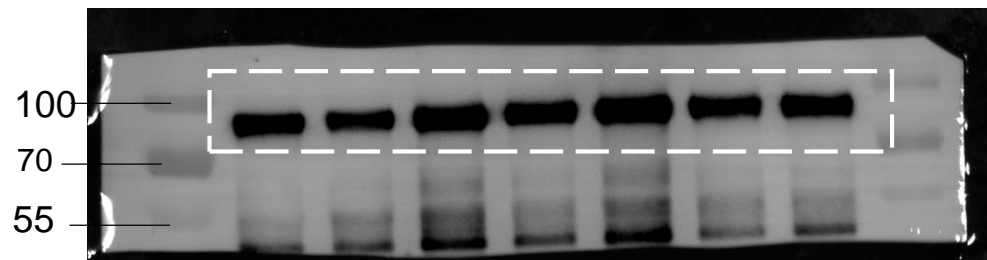

Input Flag

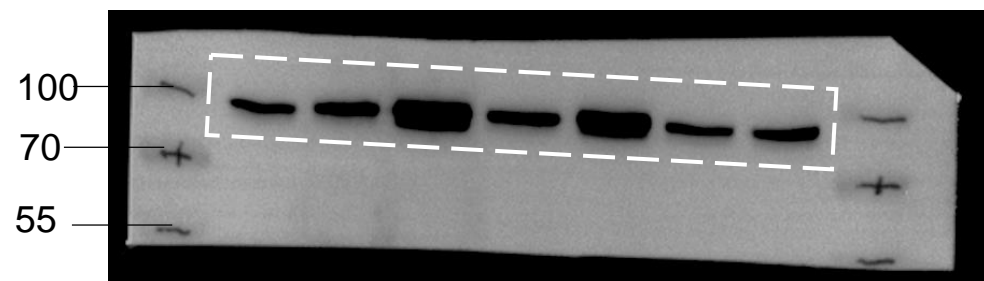

Fig 4J

IP: Ace-CHES1

130  
100  
70

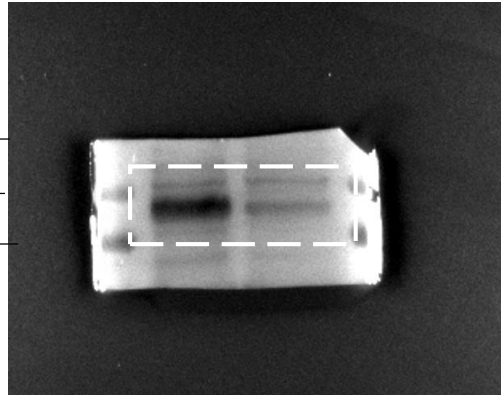

Input p300

IP p300

250  
170

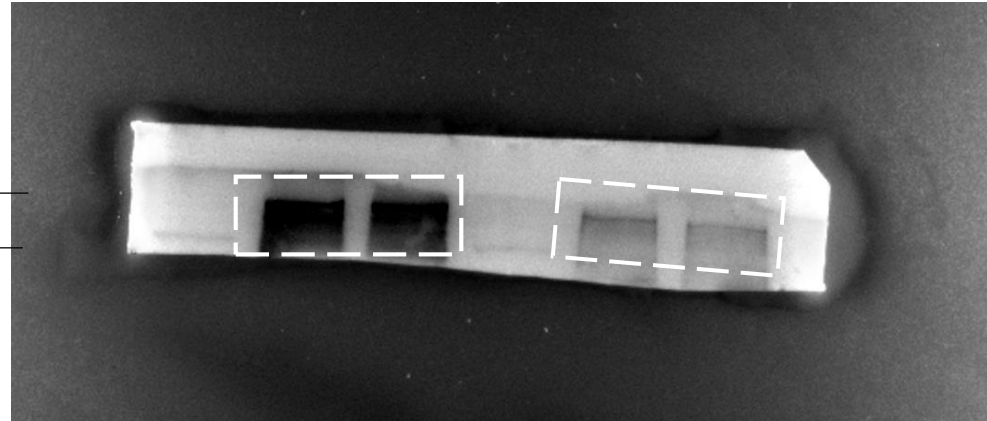

IP: Flag-CHES1

130  
100  
70

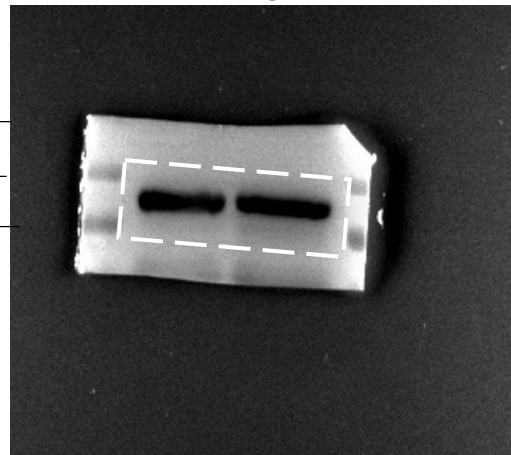

Input: Flag-CHES1

100  
70  
55

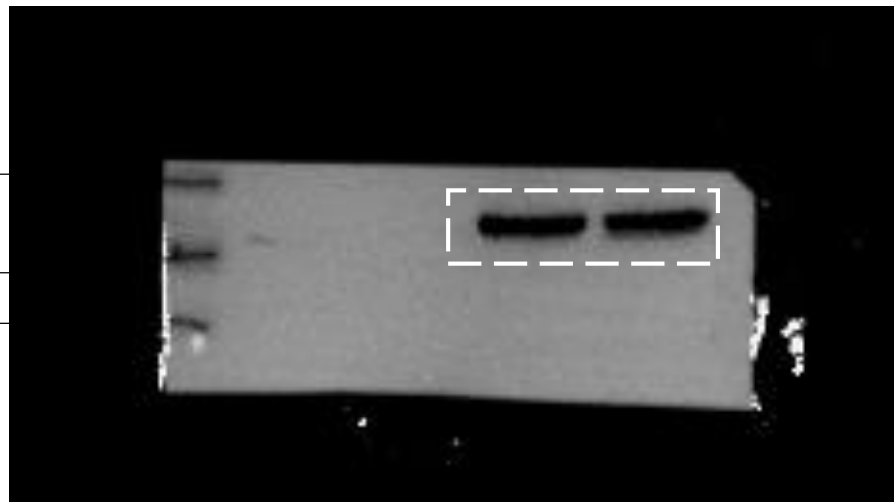

Fig 5A

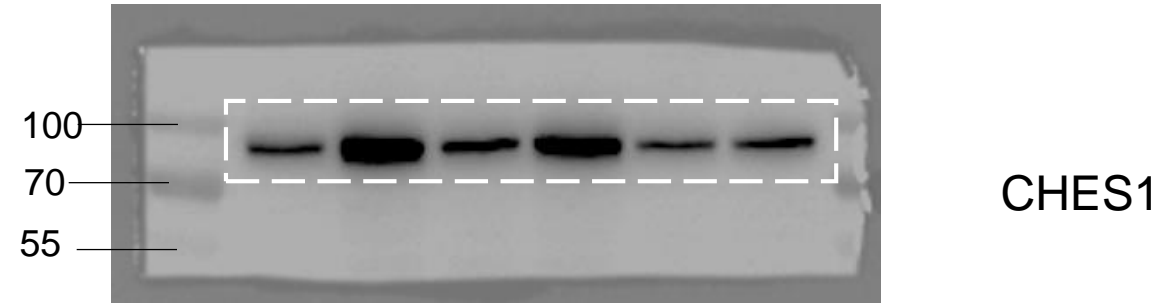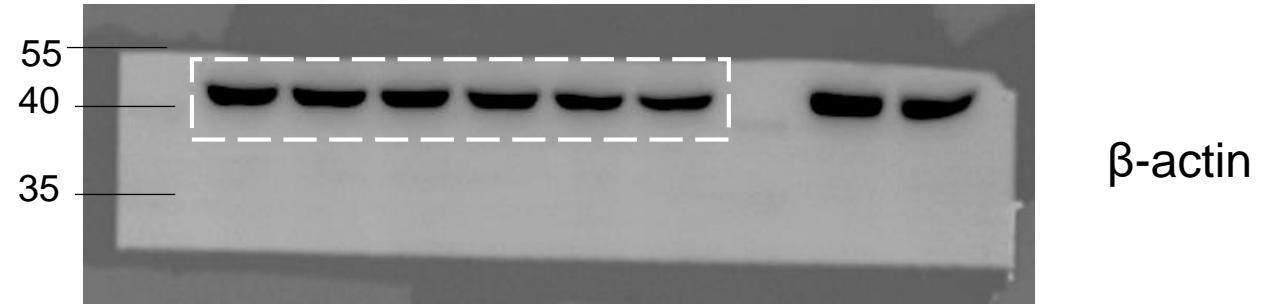

Fig 5B

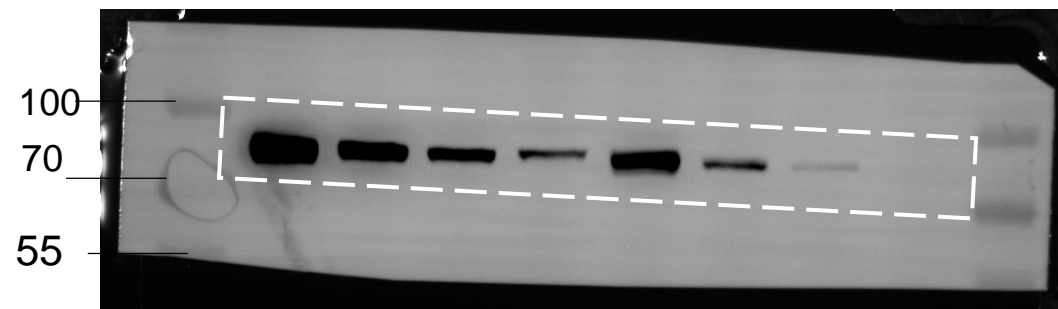

Flag

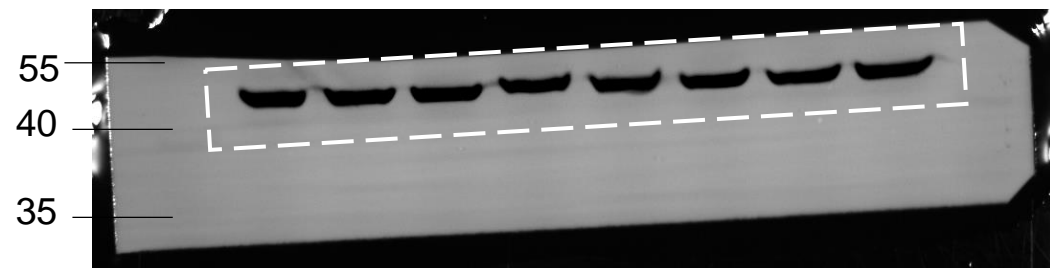

$\beta$ -actin

Fig 5C

IP: anti-HA

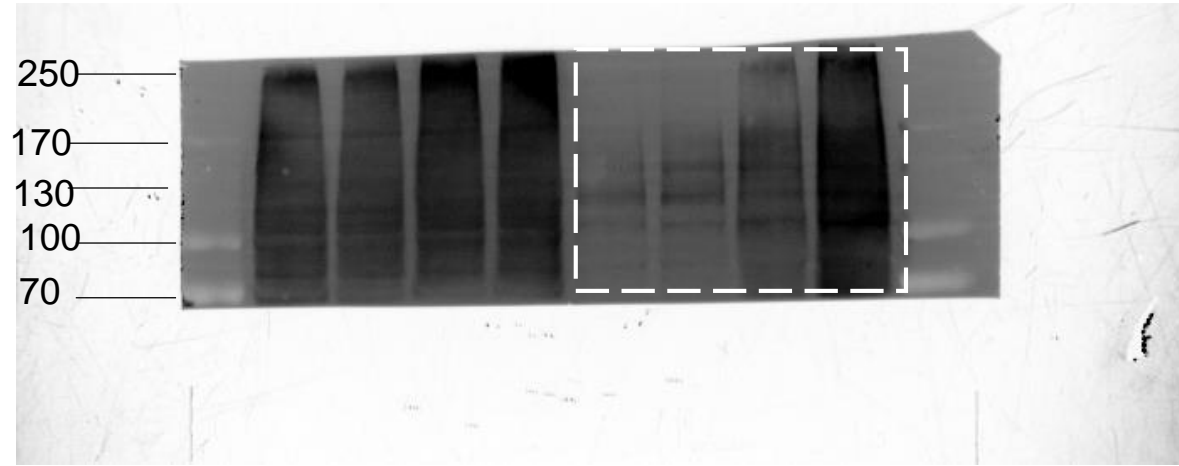

input: anti-HA

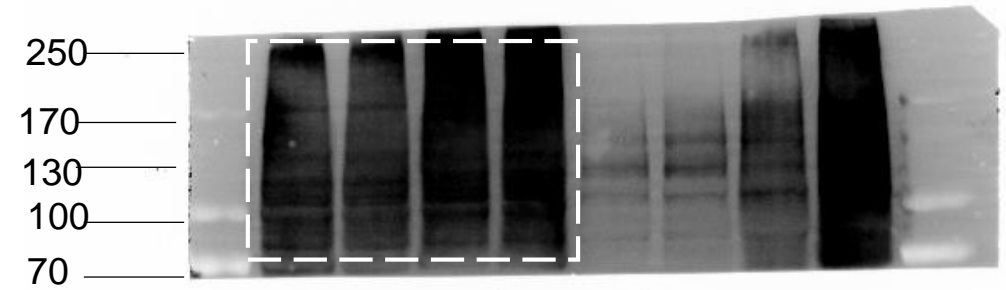

IP: anti-Flag

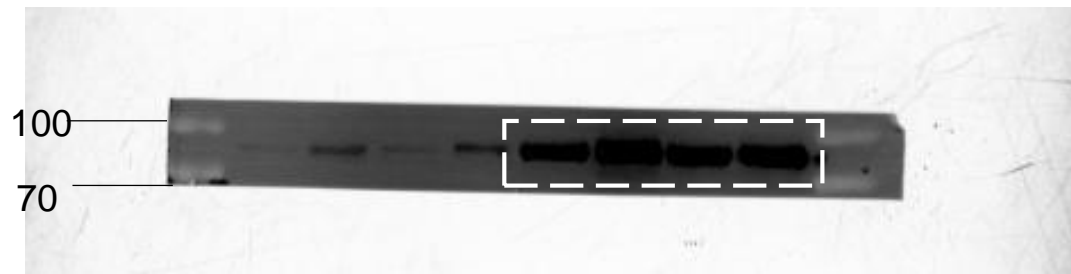

input: anti-Flag

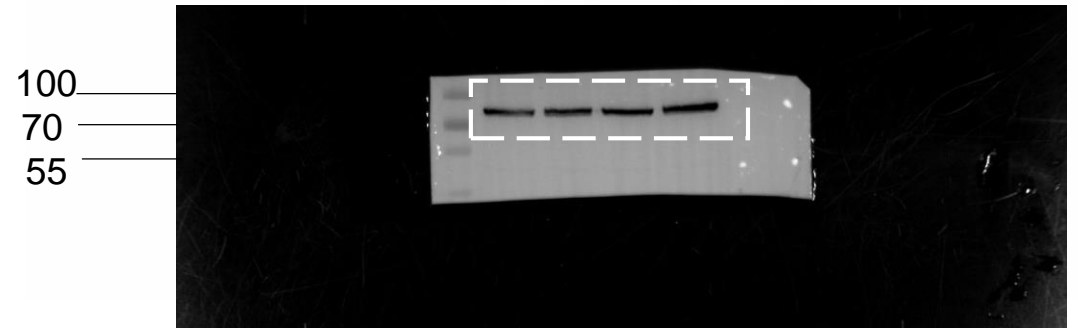

input: anti- $\beta$ -actin

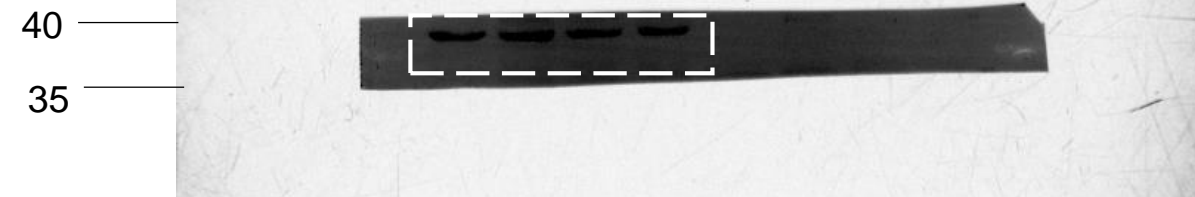

Fig 5D

IP: Ub-CHES1

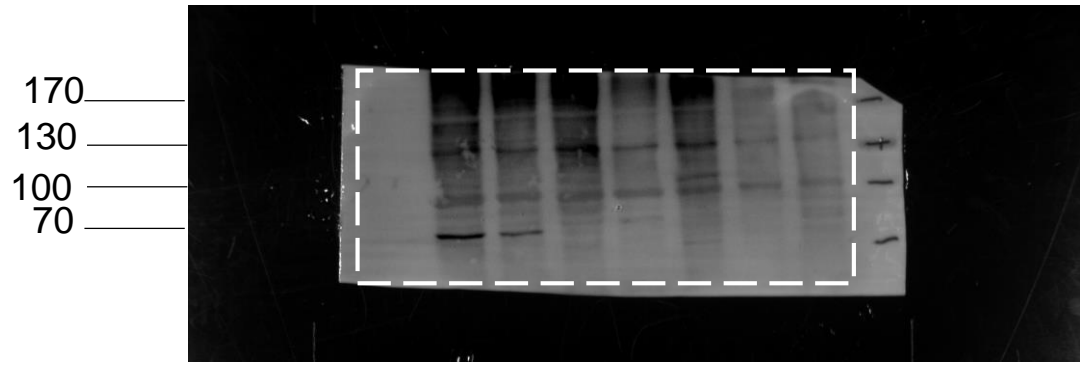

IP: Ace-CHES1

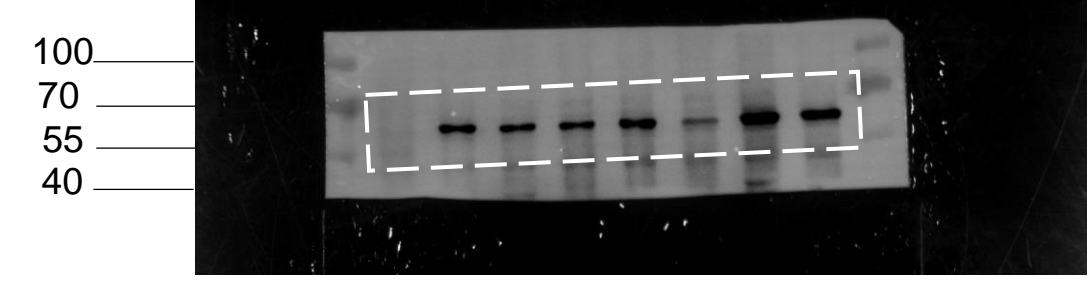

IP: total-CHES1

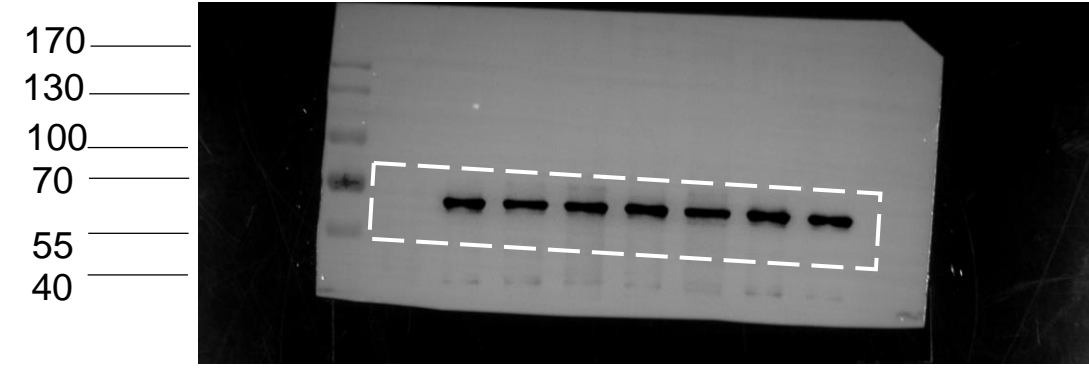

Input: CHES1

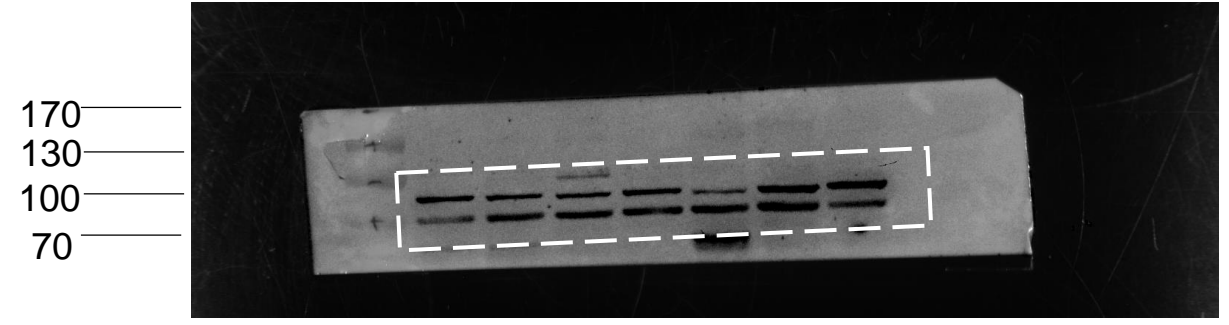

Input:  $\beta$ -tubulin

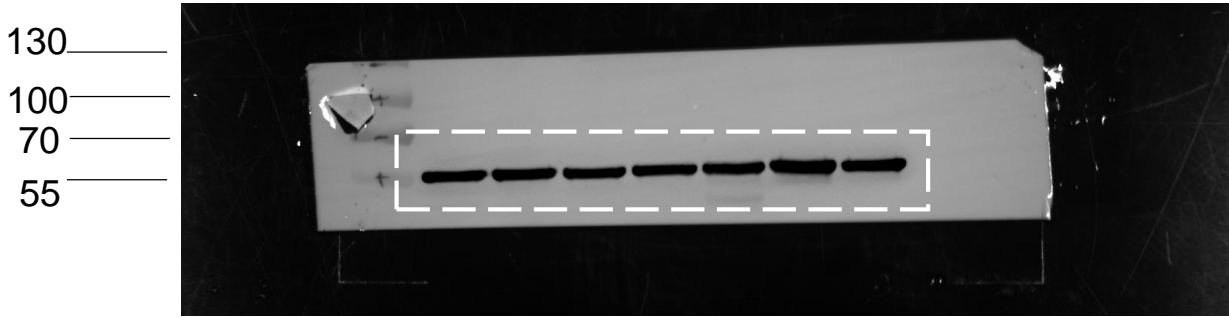

Fig 5E

HDAC1

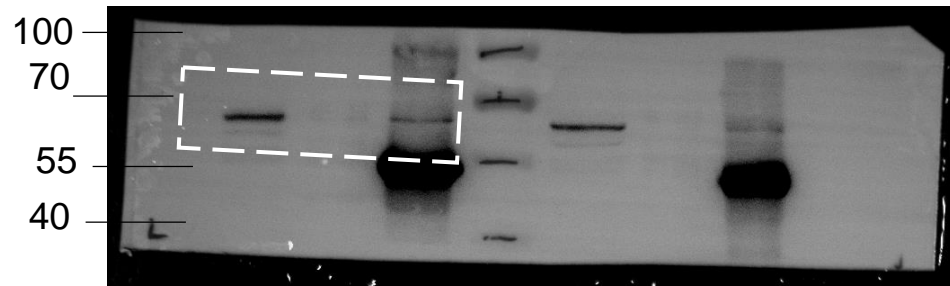

HDAC1

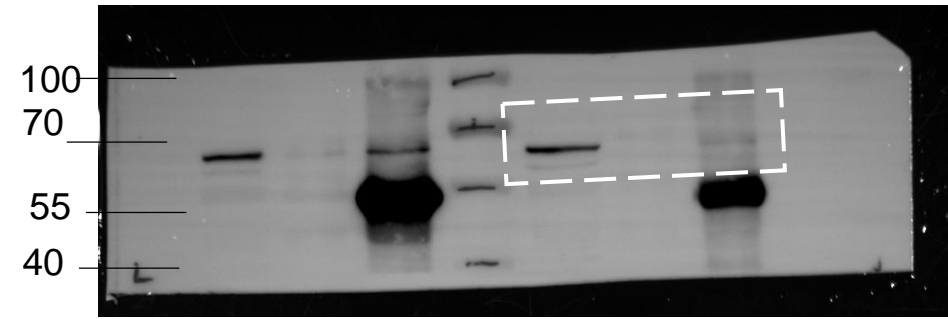

CHES1

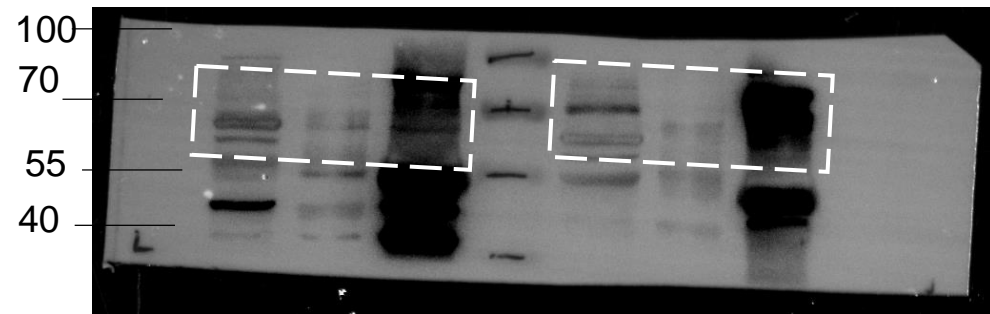



Fig 6E BT549

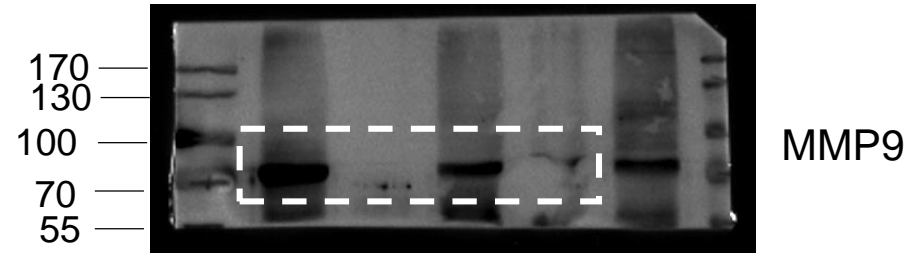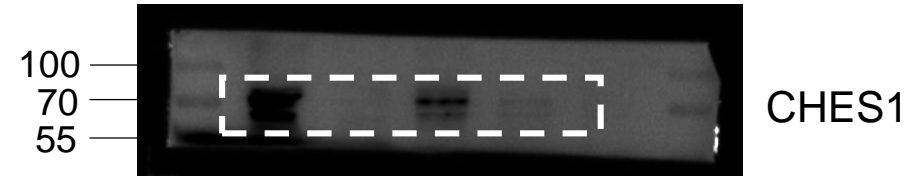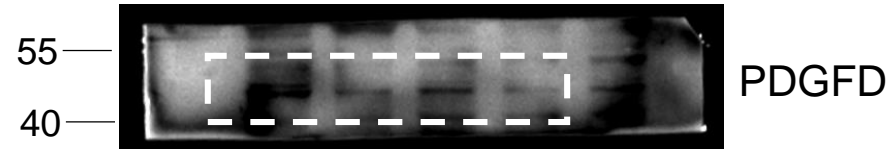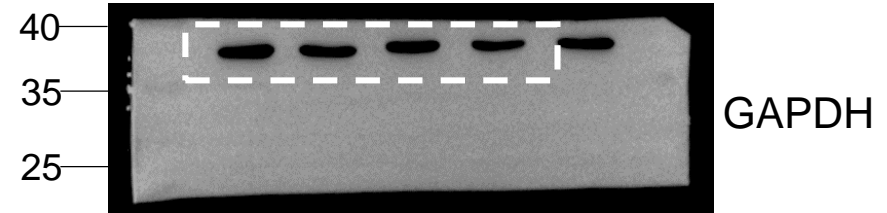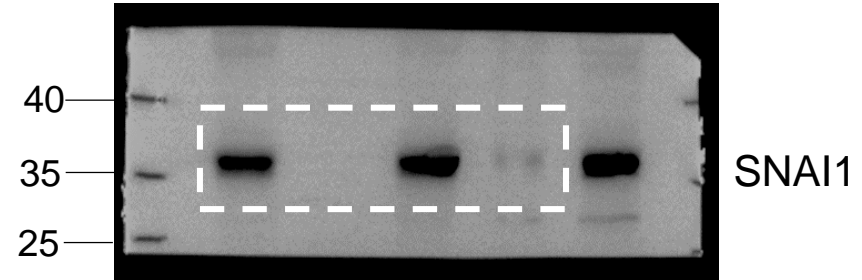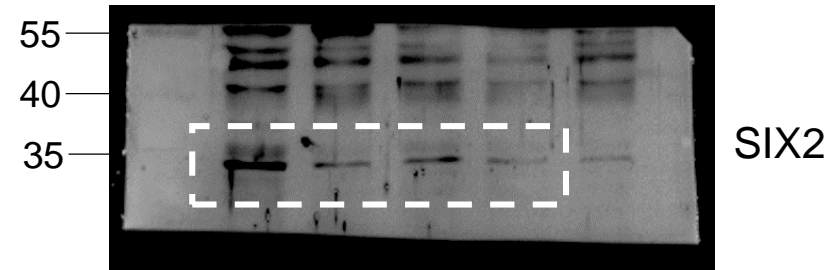

Fig 6E MDA-MB-231

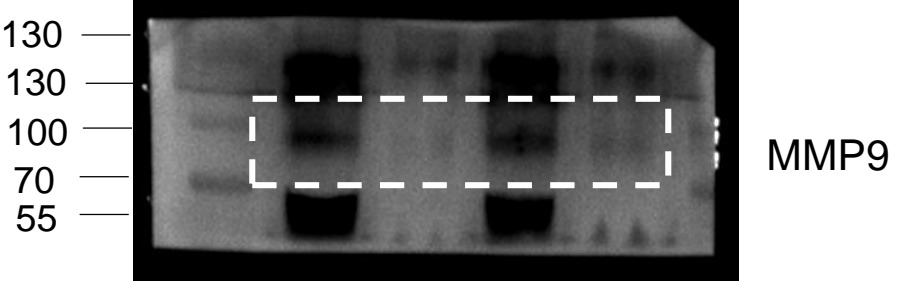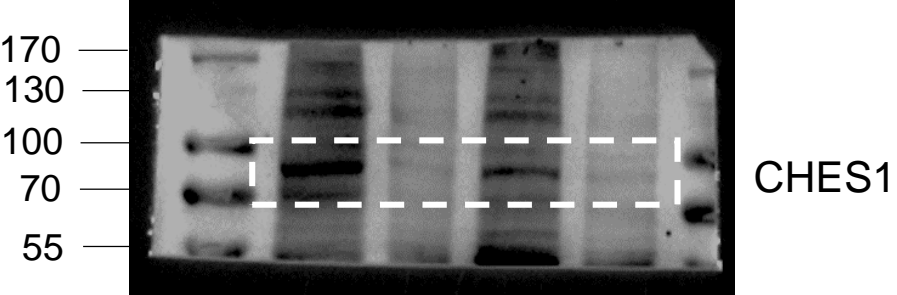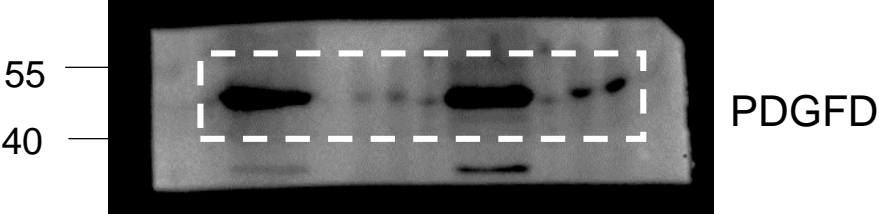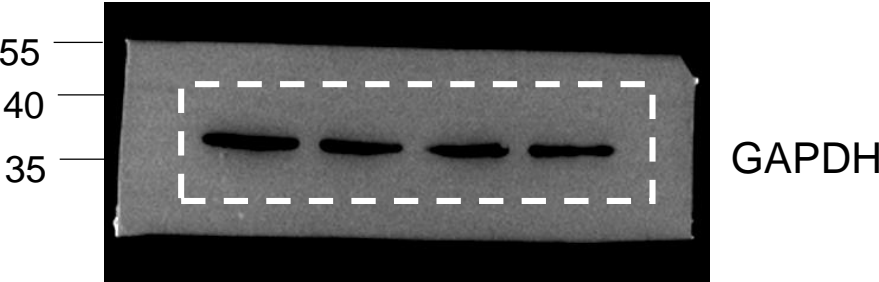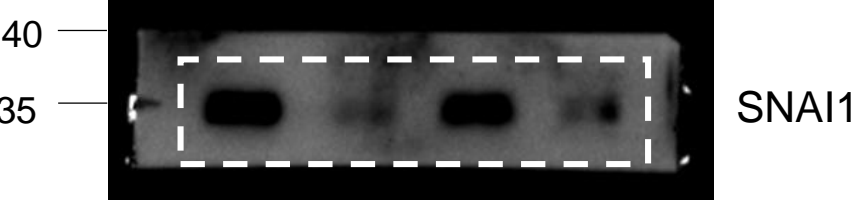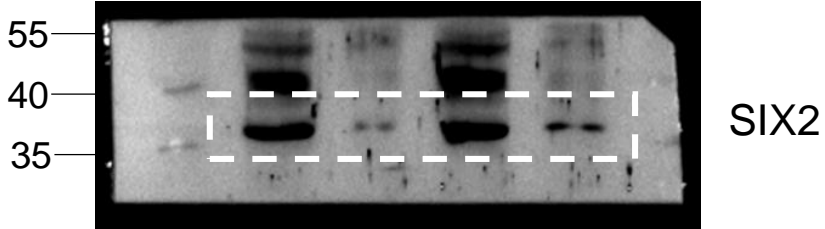

Fig S1B

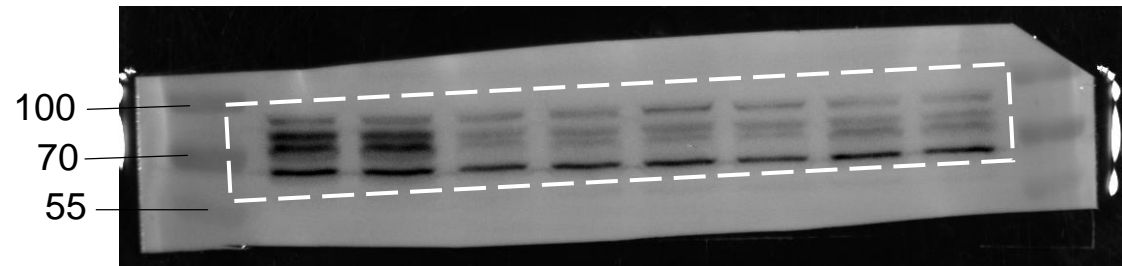

CHES1

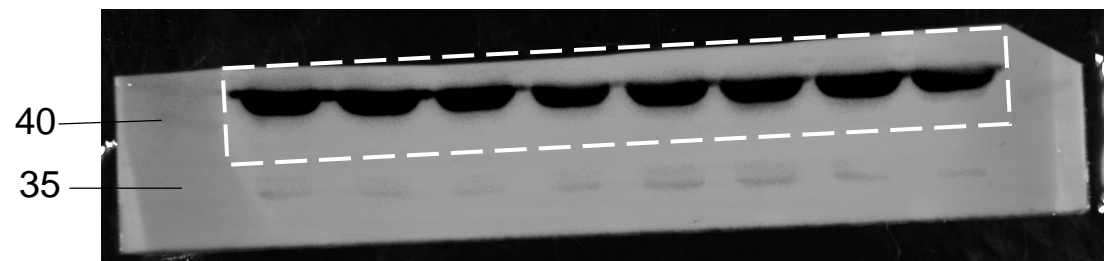

$\beta$ -actin

Fig S4A

Ac-CHES1

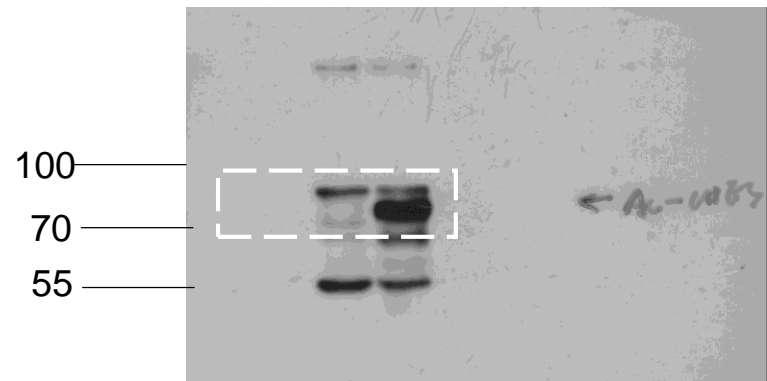

IP:Flag-CHES1

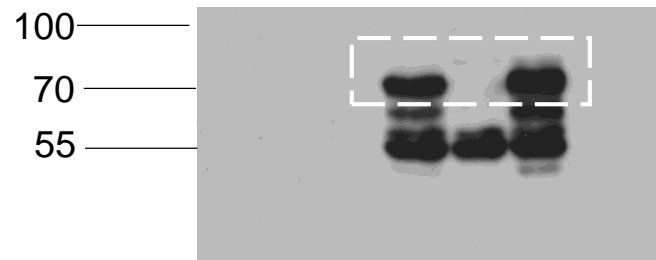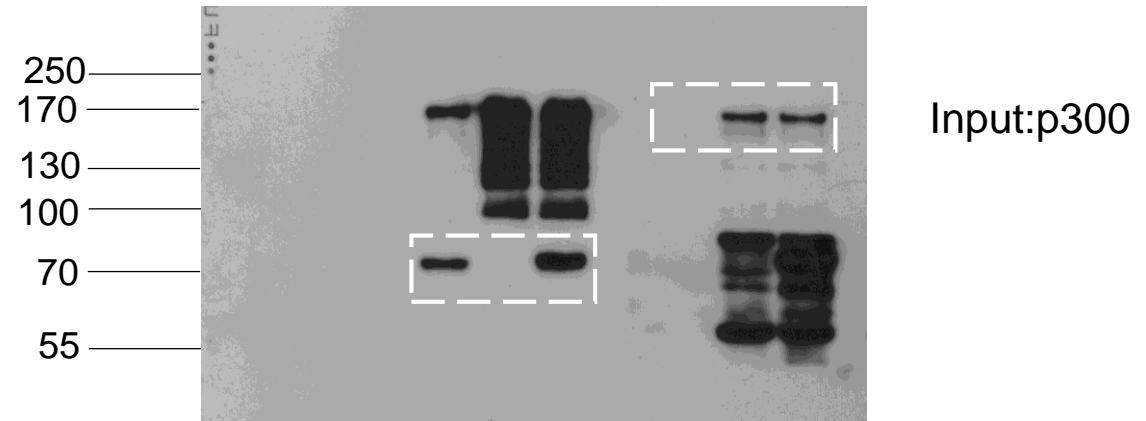

Input:Flag-CHES1

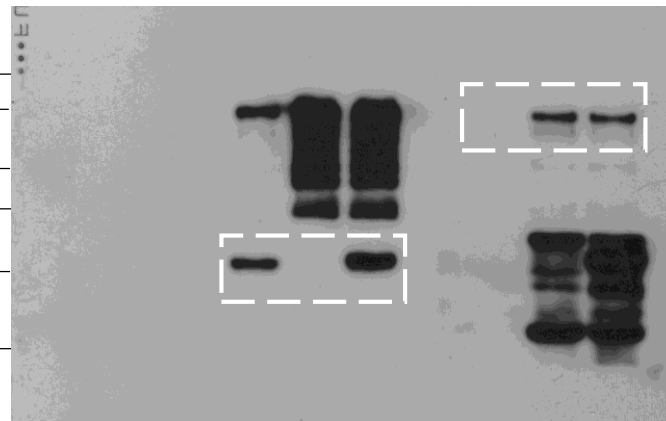

Fig S4B

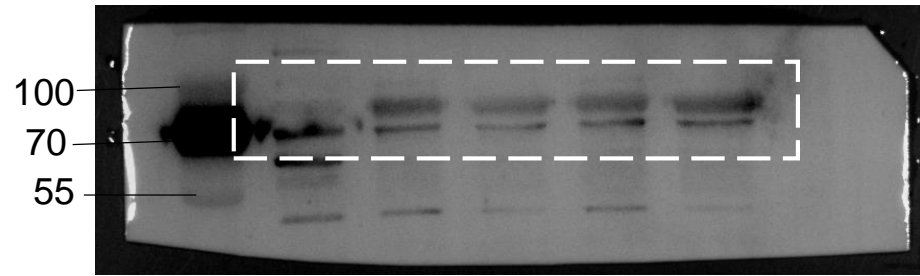

IP Ace-k (short)

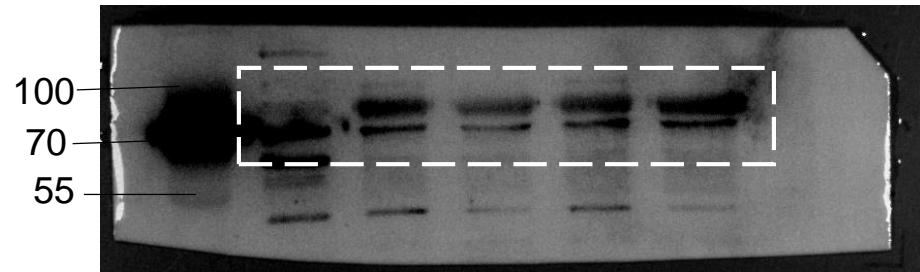

IP Ace-k (long)

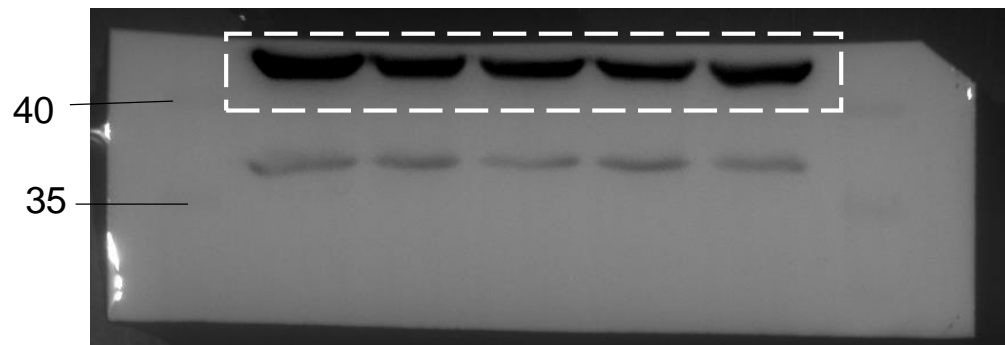

Input  $\beta$ -actin

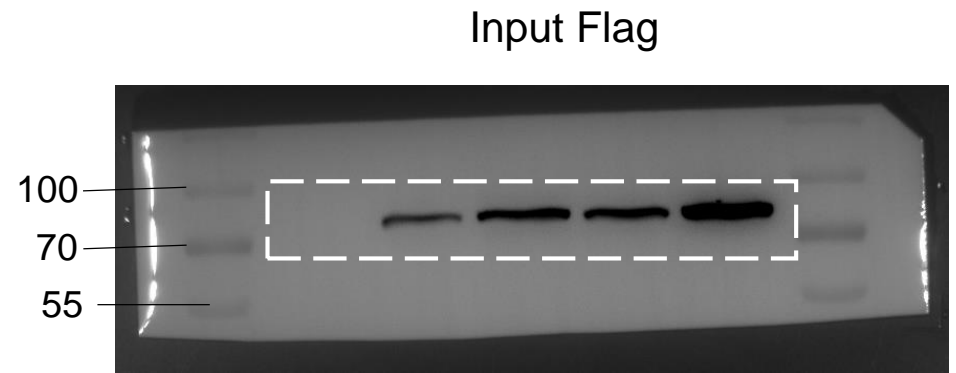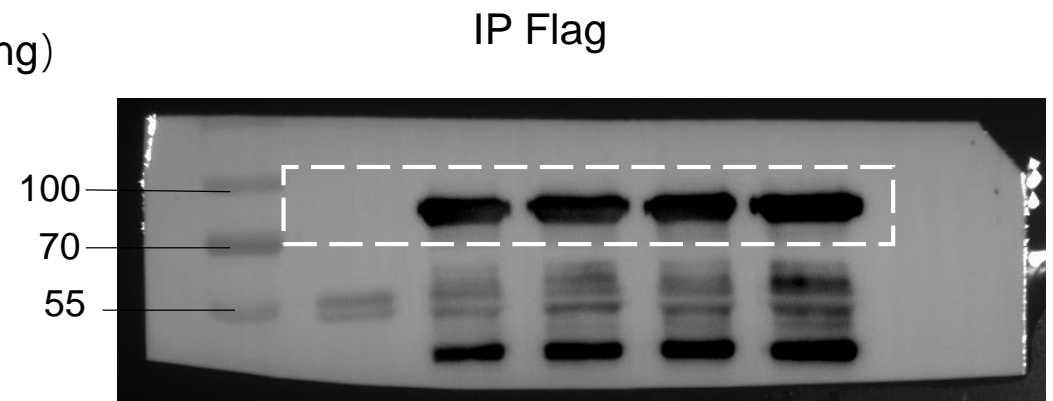

Fig S4C

IP CHES1 for sip300

IP CHES1 for siHDAC1

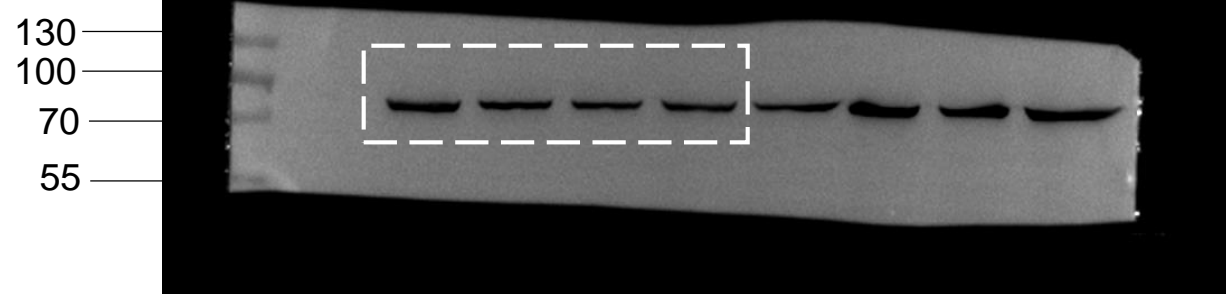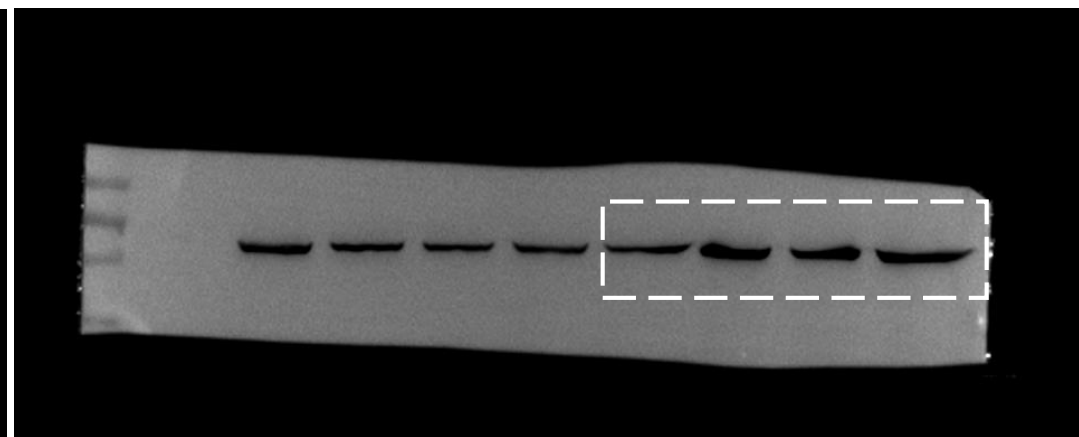

IP CHES1

Input p300

Input HDAC1

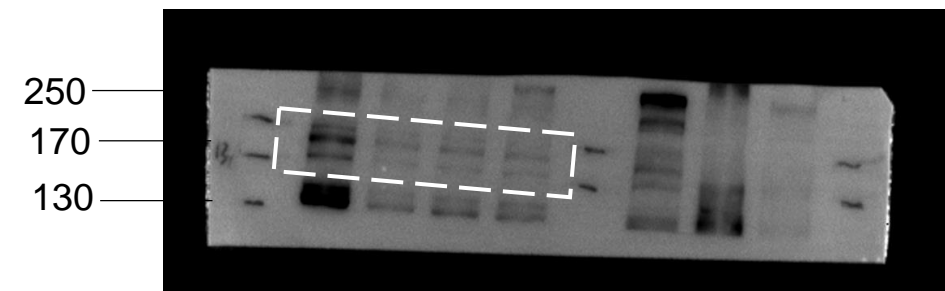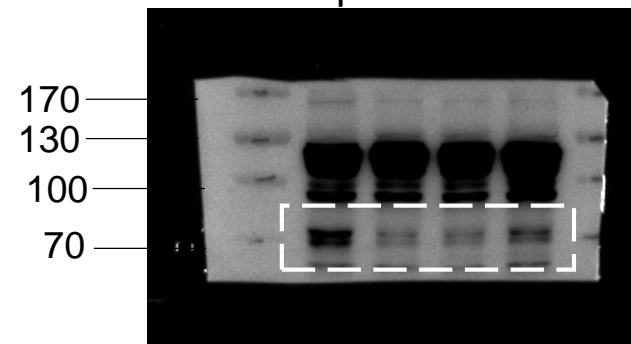

Input GAPDH for sip300

Input GAPDH for siHDAC1

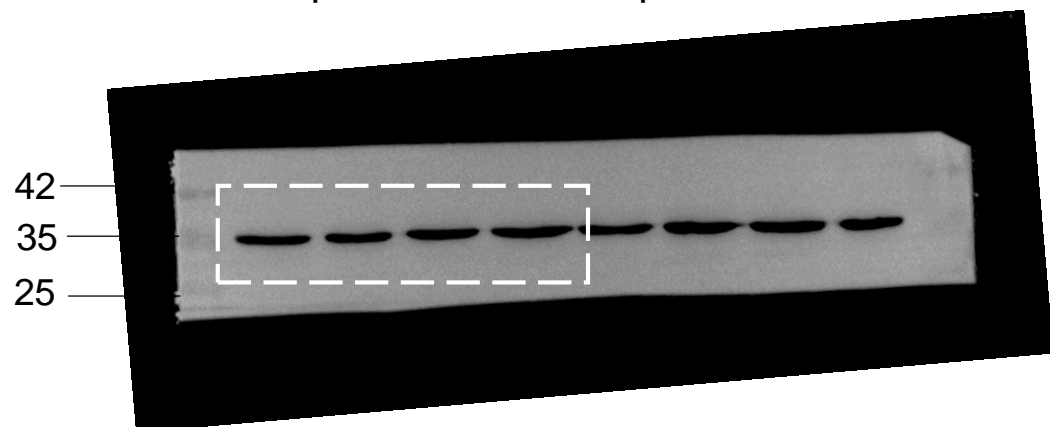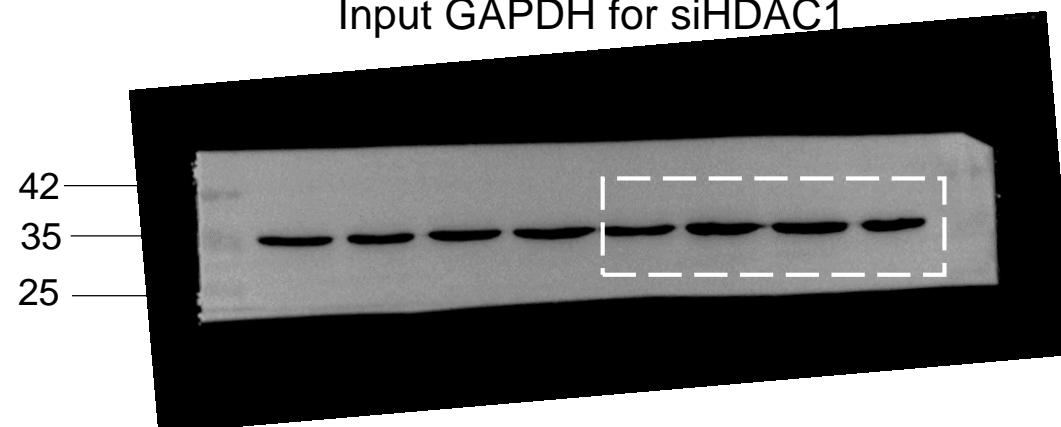

Fig S4D

Input-GFP

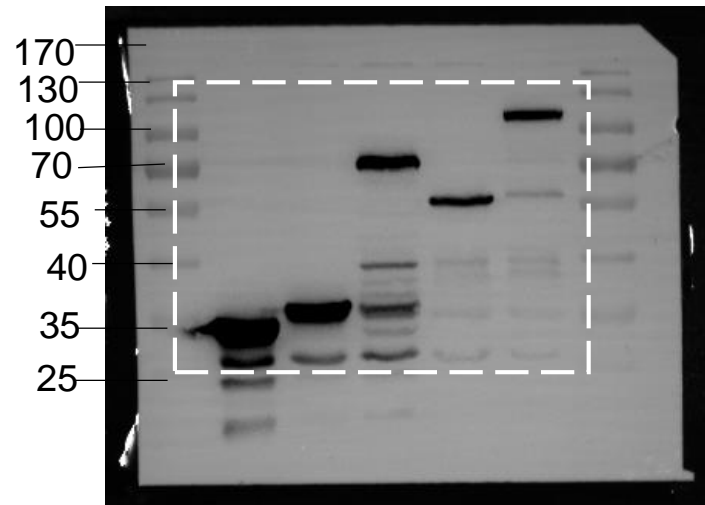

IP-ace-CHES1

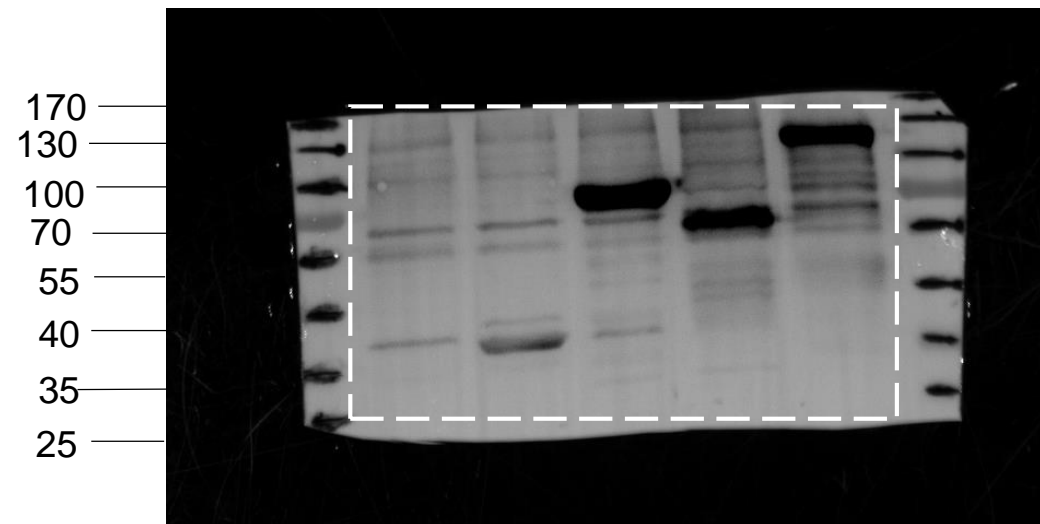

Input-p300

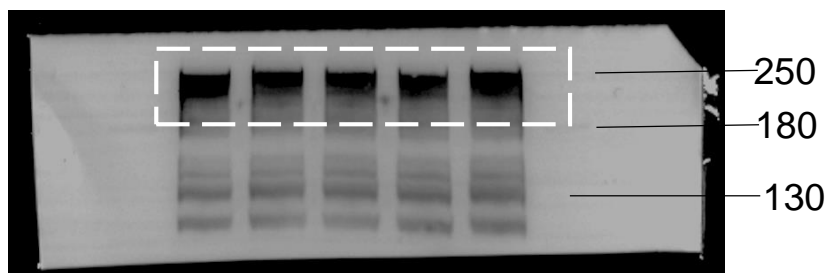

IP: GFP-CHES1

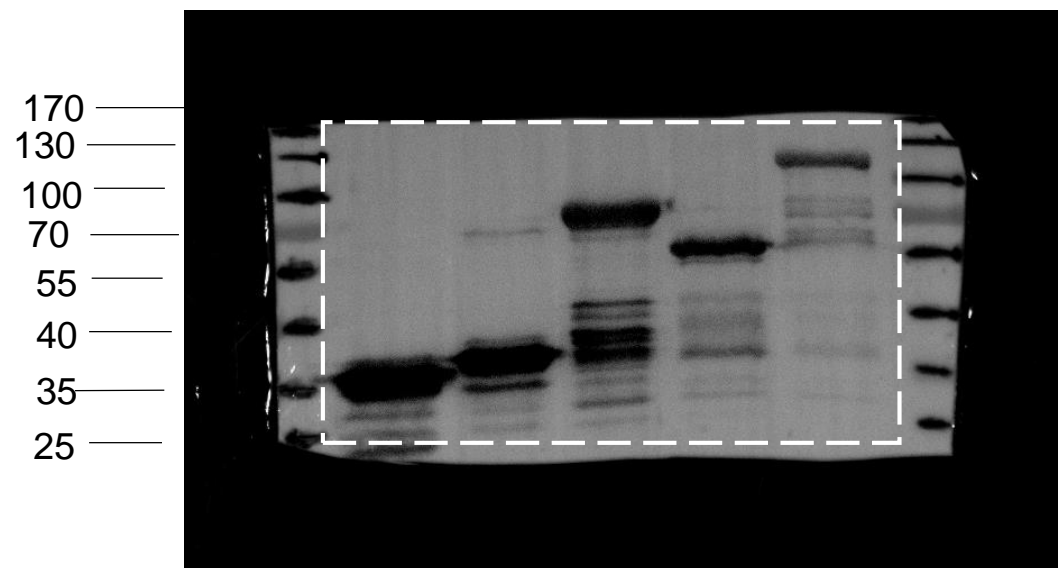

Fig S5A

Flag-CHES1, Flag-p53

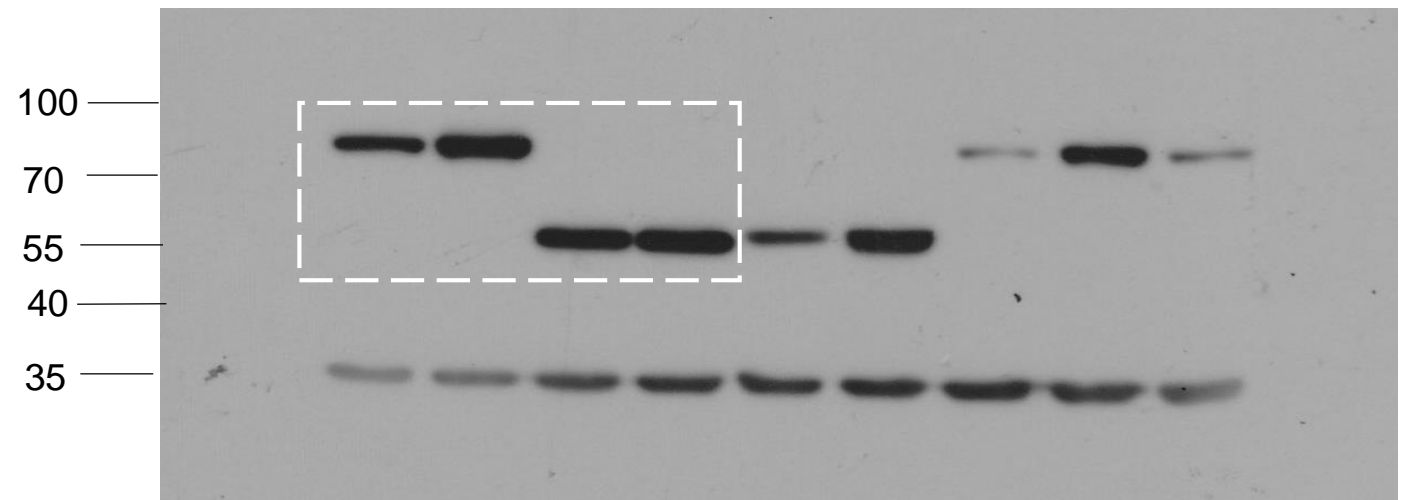

GAPDH

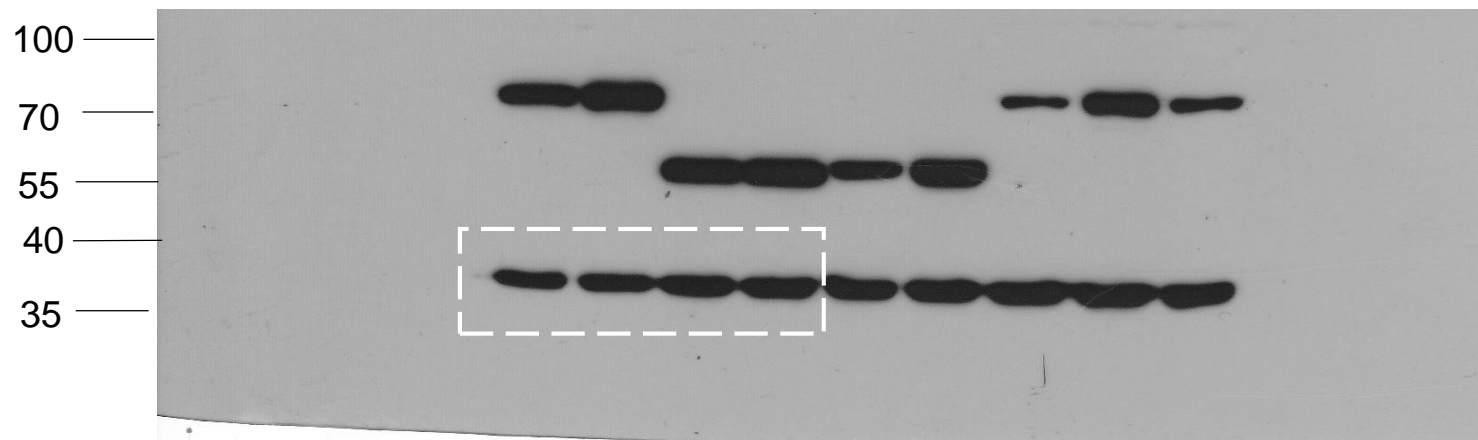



Fig S5C

IP HA

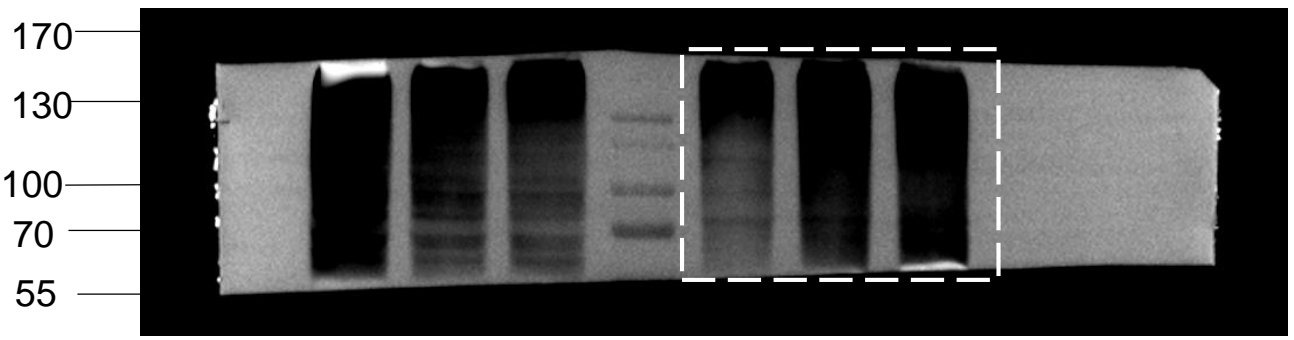

Input HA

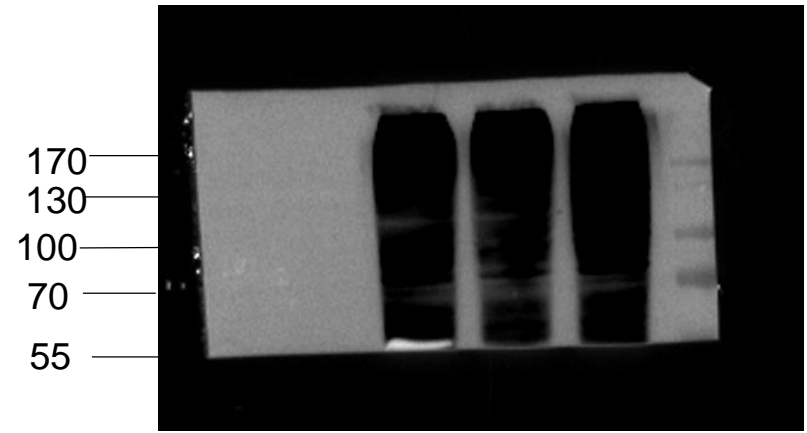

IP Flag

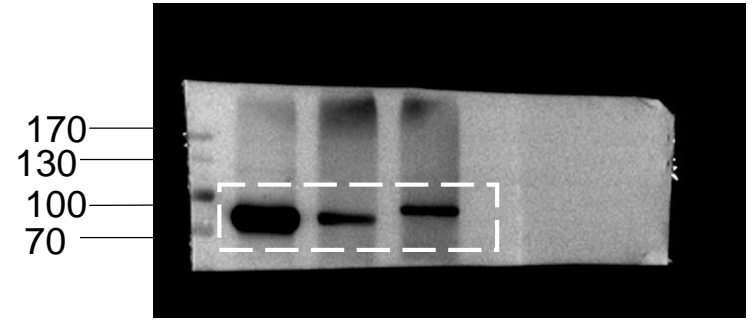

Input GAPDH

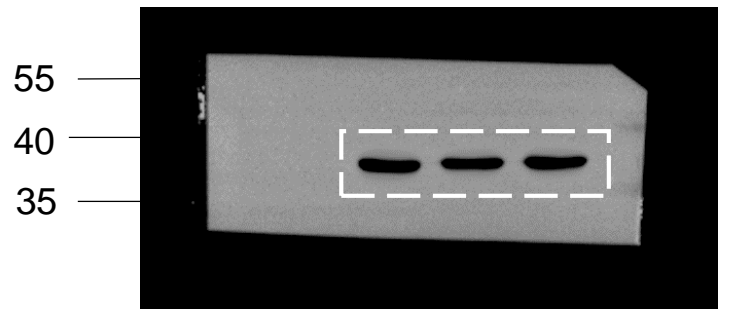

Input Flag

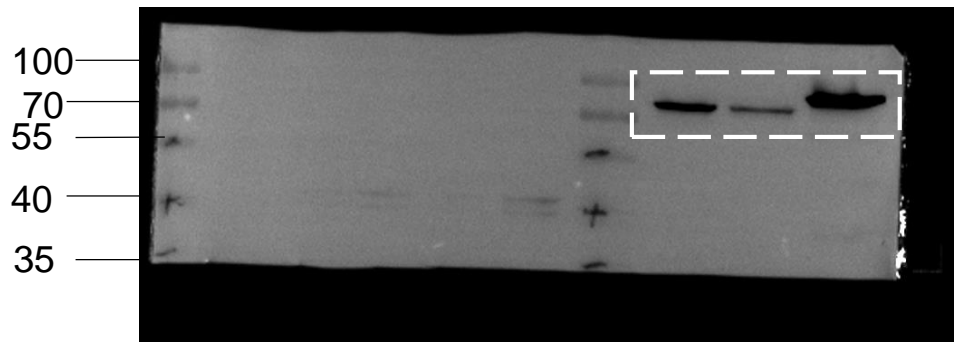

Fig S5D

Flag

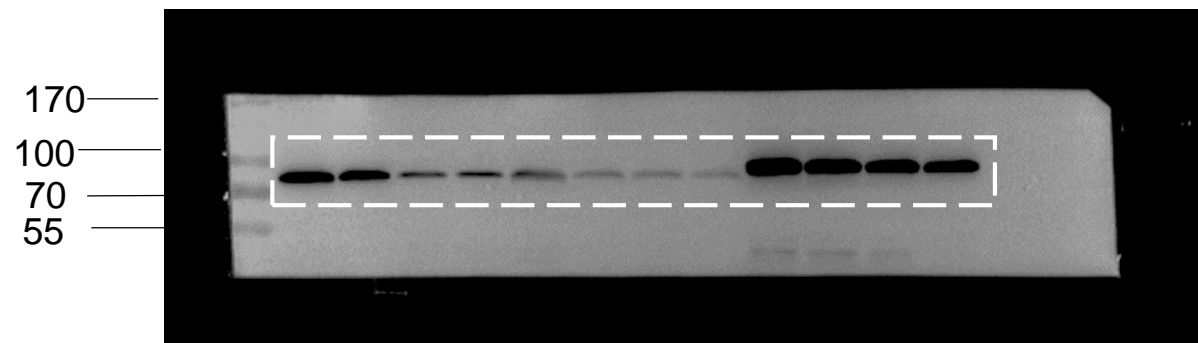

GAPDH

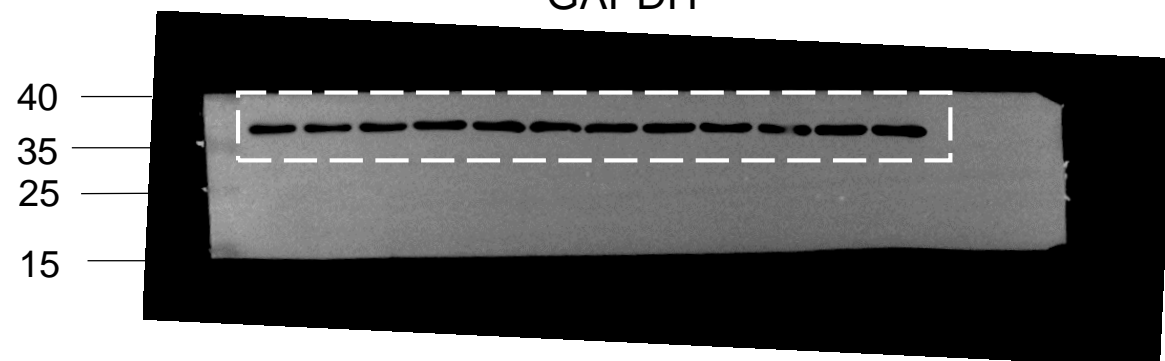

Fig S5E

T47D HDAC1

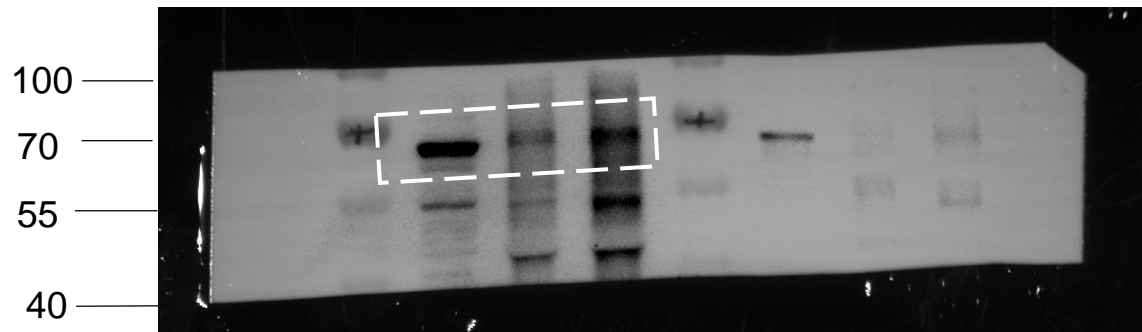

BT549 HDAC1

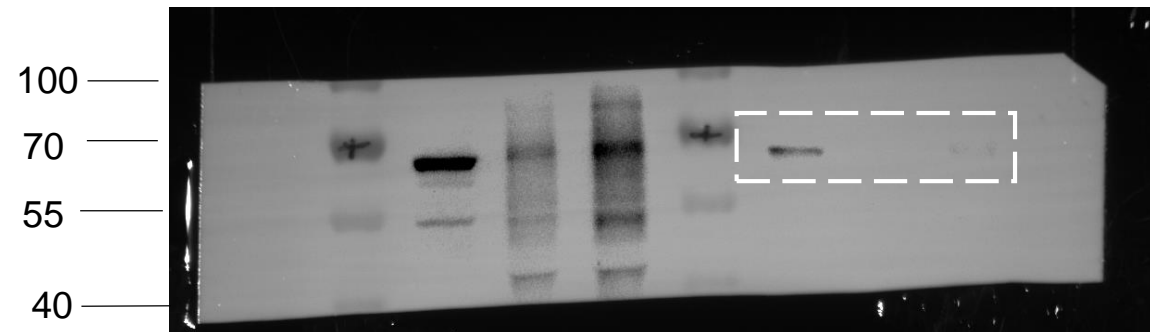

T47D CHES1

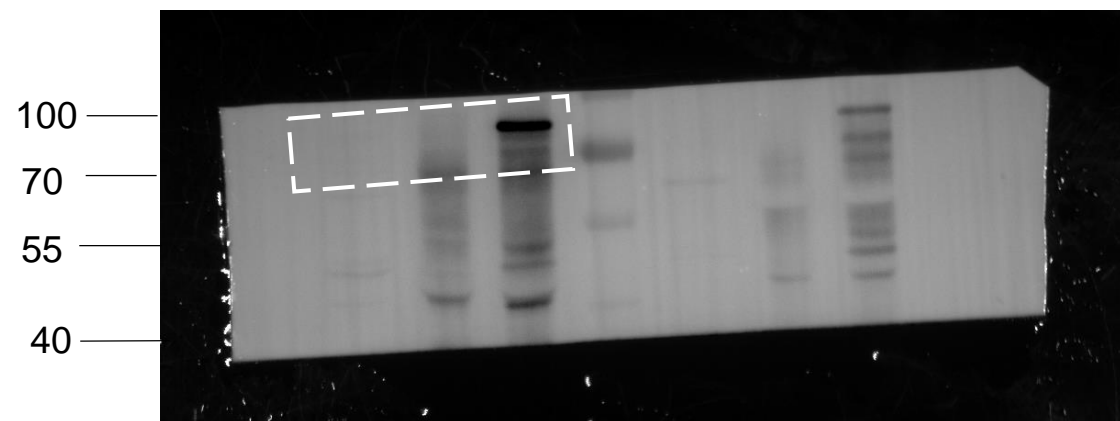

BT549 CHES1

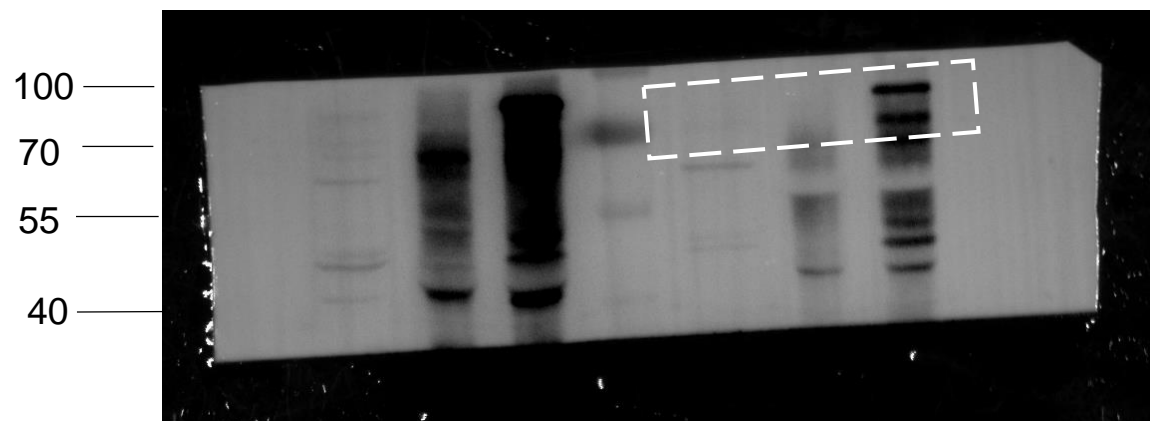

Fig S5F

p300

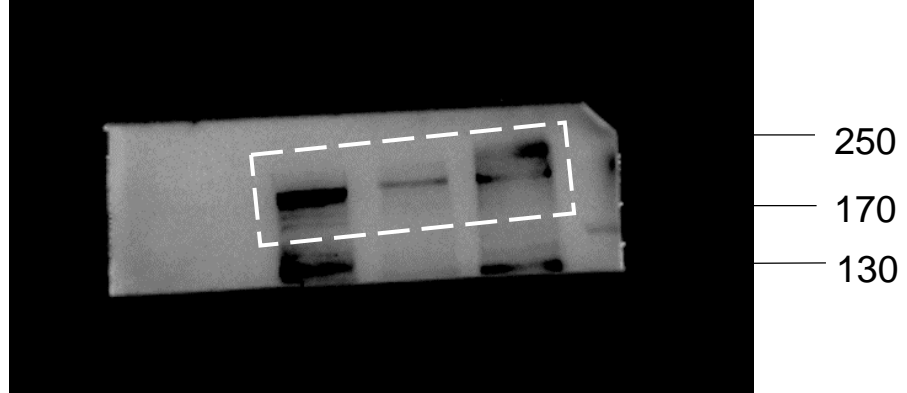

CHES1

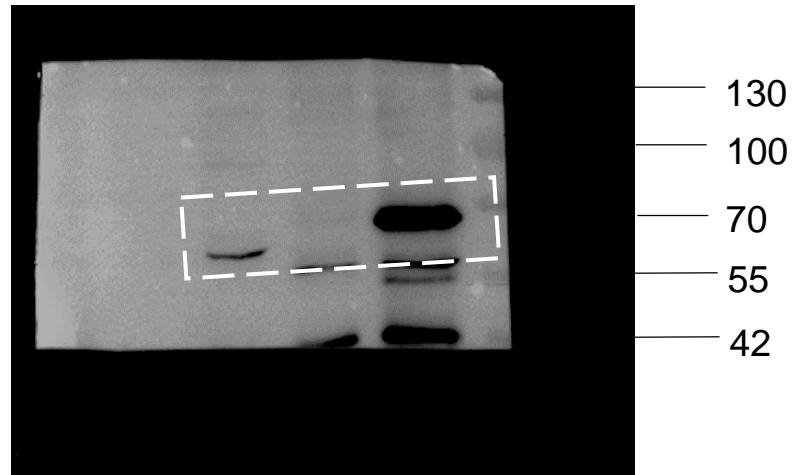

Supplement: 41420_2022_1269_MOESM4_ESM.pdf [file 41420_2022_1269_MOESM4_ESM.pdf]
